1 Title: Genetics behind the biosynthesis of nonulosonic acid containing lipooligosaccharides in

2 *Campylobacter coli*

3 Running title: *Campylobacter coli* GT-42

4 **Alejandra Culebro<sup>1\*</sup>, Michel Gilbert<sup>2</sup>, Jacek Stupak<sup>2</sup>, Jianju Li<sup>2</sup>, Warren Wakarchuk<sup>3</sup>,**

5 **Mirko Rossi<sup>1</sup>**

6 <sup>1</sup>Department of Food Hygiene and Environmental Health, Faculty of Veterinary Medicine,

7 University of Helsinki, Agnes Sjöbergin katu 2, Helsinki, FI-00014, Finland.

8 <sup>2</sup>Human Health Therapeutics, National Research Council Canada, Ottawa, ON K1A 0R6,

9 Canada

10 <sup>3</sup>Department of Chemistry and Biology, Ryerson University, Toronto, ON M5B 2K3, Canada

11 \* Corresponding author: e-mail: kei@hotmail.fi

12 Keywords: *Campylobacter*; LOS; GT42; sialyltransferase;

13

14 **ABSTRACT**

15 *Campylobacter jejuni* and *Campylobacter coli* are the most common cause of bacterial  
16 gastroenteritis in the world. Ganglioside mimicry by *C. jejuni* lipooligosaccharide (LOS) is the  
17 triggering factor of Guillain-Barré syndrome (GBS), an acute polyneuropathy.  
18 Sialyltransferases from the glycosyltransferase (GT) family 42 are essential for the expression  
19 of ganglioside mimics in *C. jejuni*. Recently, two novel GT-42 genes, *cstIV* and *cstV*, have  
20 been identified in *C. coli*. Despite being present in ~11% of currently available *C. coli* genomes,  
21 the biological role of *cstIV* and *cstV* is unknown. Here, we show that CstIV and CstV are  
22 involved in LOS biosynthesis. Additionally, *cstV* is associated with LOS sialylation, while  
23 *cstIV* is linked to the addition of a diacetylated nonulosonic acid residue.

## 24 INTRODUCTION

25 Nonulosonic acids are a highly diverse family of nine-carbon  $\alpha$ -keto acids. The most natural  
26 abundant nonulosonic acids are the sialic acids (*N*-acetylneuraminic acid, Neu5Ac) and  
27 derivatives<sup>1</sup>. Initially thought to be only a deuterostomes feature, sialic acids have been found  
28 in virulence associated bacterial cell surface glycoconjugates such as lipopolysaccharides,  
29 capsules, pili, and flagella<sup>2-4</sup>. Furthermore, these sialylated structures have been shown to  
30 influence pathogenesis through immune evasion, adhesion, and invasion<sup>5,6</sup>. Sialyltransferases,  
31 catalyse the transfer of sialic acid from cytidine-5'-monophospho-*N*-acetylneuraminic acid  
32 (CMP-Neu5Ac) to an acceptor, are key in the synthesis of sialoglycoconjugates. Known  
33 sialyltransferases have been classified into five distinct CAZy (Carbohydrate-active enzymes  
34 database) glycosyltransferase (GT) families; GT-29, GT-38, GT-42, GT-52, and GT-80<sup>7</sup>. In  
35 *Campylobacter jejuni*, the most common cause of bacterial gastroenteritis, CMP-Neu5Ac  
36 biosynthesis (*neuA*, *neuB1*, and *neuC*) and GT-42 genes are present in the lipooligosaccharide  
37 (LOS) biosynthesis locus classes A, B, C, M, R, and V<sup>8-10</sup>. *C. jejuni* strains carrying one of  
38 these genetic classes synthesize LOS structures generally resembling gangliosides<sup>9, 11-13</sup>. In  
39 some cases, infection with a *C. jejuni* strain expressing ganglioside-like LOS induces  
40 production of cross-reactive anti-ganglioside antibodies. This leads to the development of  
41 Guillian-Barré syndrome (GBS); an acute autoimmune polyradiculoneuropathy disease with  
42 ~5% mortality rate<sup>14</sup>.

43 *C. coli*, the second most common cause of campylobacteriosis, has also been isolated from  
44 GBS patients<sup>15-18</sup>. Nevertheless, the role of *C. coli* in GBS has largely remained unclear due  
45 to the seemingly absence of key elements for the synthesis of ganglioside-like LOS (i.e GT-42  
46 and *neuABC*). Recently, three newly identified *C. coli* LOS-associated GT-42 genes were  
47 reported; *cstIV*, *cstV*, and *cstVI*<sup>10, 19, 20</sup>. While *cstVI* is generally found as a pseudogene, *cstIV*

48 and *cstV* may potentially be involved in LOS biosynthesis<sup>19</sup>. In this manuscript we sought to  
49 explore the role of the new GT-42 enzymes CstIV and CstV in LOS biosynthesis.

## 50 **RESULTS**

### 51 **CstIV and CstV exhibit no sialyltransferase activity *in vitro*.**

52 To determine whether CstIV and CstV are capable of transferring Neu5Ac, *C. coli* crude  
53 protein extracts were tested for sialyltransferase activity using sugar acceptors labelled with  
54 either boron-dipyrromethene or BODIPY (BDP) and fluorescein (FCHASE).  
55 Monosialyltransferase activity on BDP-Lactose (BDP-Lac) and BDP-*N*-acetyllactosamine  
56 (BDP-LacNAc) was detected in *C. coli* 76339 WT, *C. coli* 76339  $\Delta$ *cstV*-SF1, and *C. coli* 76339  
57  $\Delta$ *cstV*-SR4 crude protein extracts (Suppl. Fig. 1). Conversely, no measurable enzymatic  
58 activity on any of the tested acceptors was detected in *C. coli* 76339 $\Delta$ *cstI*-XR3 and *C. coli*  
59 76339 $\Delta$ *cstV*-SR $\Delta$ *cstI*-XR1 protein extracts. Likewise, no sialyltransferase activity was  
60 detected in the crude protein extracts of *C. coli* 65 and 73, *C. coli* 65  $\Delta$ *cstIV*-SF5 and *C. coli*  
61 73  $\Delta$ *cstIV*-SF3. Furthermore, recombinant CstIV and CstV showed no activity with any of the  
62 tested acceptors (Suppl. Fig. 2).

### 63 **CstIV and CstV are involved in LOS biosynthesis.**

64 The LOS of  $\Delta$ *cstIV* and  $\Delta$ *cstV* strains showed an increased mobility on silver stained SDS-  
65 PAGE gels relative to the WTs (Fig. 1). Thus, deletion of *cstV* in *C. coli* 76339 and *cstIV* in *C.*  
66 *coli* 65 and 73 resulted in a truncated LOS. The complemented *cstV* mutant exhibited two LOS  
67 bands on SDS-PAGE gels; the upper one corresponding to the WT LOS and the lower  
68 molecular weight band to the truncated LOS (Suppl. Fig. 3). This suggests that partial  
69 restoration of the phenotype was achieved upon complementation in *cis* of  $\Delta$ *cstV*-SR4.

### 70 ***C. coli* 76339 *neuB* is involved in the biosynthesis of CstV substrate.**

71 Since no clear shift in the electrophoretic mobility of *C. coli* 76339 LOS was detected after  
72 neuraminidase treatment (Suppl. Fig. 4), *neuBI* was knocked out to determine whether CMP-  
73 Neu5Ac was CstV's substrate. The LOS of 76339  $\Delta$ *neuB*-SR2 showed a similar profile to those  
74 of 76339  $\Delta$ *cstV*-SF1 and 76339  $\Delta$ *cstV*-SR4 (Suppl. Fig. 5). Thus, deletion of *neuB* results in a  
75 seemingly similar LOS truncation to the one observed in  $\Delta$ *cstV* strains, suggesting the potential  
76 involvement of *neuBI* in CstV substrate synthesis.

### 77 **CstIV and CstV are associated to nonulosonate residues in *C. coli* LOS**

78 Predicted LOS compositions by LC-MS for *C. coli* 76339 WT and mutants are shown on  
79 Table 1. *C. coli* 76339 contains a core oligosaccharide linked via two 3-deoxy-D-manno-oct-  
80 2-ulosonic acid (Kdo) molecules to a lipid A molecule. The core oligosaccharide of *C. coli*  
81 76339 is composed of heptoses (Hep), hexoses (Hex), hexosamines (HexNAc), and NeuAc.  
82 The resulting MS/MS spectrum obtained from the O-deacylated LOS of *C. coli* 76339 WT  
83 revealed a single ion at  $m/z$  1214.4 corresponding to Hex<sub>3</sub>•Hep<sub>2</sub>•PEtn<sub>1</sub>•KDO<sub>1</sub> (Fig. 2). The  
84 fragment ions at  $m/z$  1052.4 and 890.3 correspond to the additional loss of two Hex residues.  
85 The spectra also revealed ions that derived from lipid A,  $m/z$  693.5 and  $m/z$  388.3  
86 corresponding to HexN<sub>3</sub>N<sub>1</sub>•P<sub>1</sub>•(C14:0 3-OH)<sub>2</sub> and HexN<sub>3</sub>N<sub>1</sub>•(C14:0 3-OH)<sub>1</sub>, respectively.  
87 The observation of fragment ions at  $m/z$  292.1 and 274.1 provided evidence for the presence  
88 of sialic acid on core region LOS. The MS/MS spectrum of precursor ion  $m/z$  1064.0 from *C.*  
89 *coli* 76339  $\Delta$ *cstI* is similar to that from *C. coli* 76339 WT, in which the diagnostic ions for  
90 sialic acid were detected at  $m/z$  292.1 and 274.2 (Fig. 2b). However, no sialic acid was  
91 detected in the MS/MS spectrum *C. coli* 76339  $\Delta$ *cstV* (Fig. 2c). Thus, *cstV* is associated to  
92 the presence of NeuAc, while *cstI* plays no role in *C. coli* 76339 LOS biosynthesis.

94 A similar lipid A moiety was indicated by the MS/MS spectrum obtained from the *O*-  
95 deacylated LOS of *C. coli* strain 73 WT. The spectra also revealed ions that derived from  
96 lipid A,  $m/z$  693.5 and  $m/z$  388.3 corresponding to HexN<sub>3</sub>N<sub>1</sub>•P<sub>1</sub>•(C14:0 3-OH)<sub>2</sub> and  
97 HexN<sub>3</sub>N<sub>1</sub>•(C14:0 3-OH)<sub>1</sub>, respectively. The observation of fragment ions at  $m/z$  317.2 and  
98 299.1 provided evidence for the presence of a residue with a molecular weight of 334.2 Da or  
99 316.2 Da for its anhydrous form on core region LOS (Fig. 3a). These masses are consistent  
100 with free diNAc-nonulosonate and its conjugated form, respectively. However, these  
101 characteristic ions were not detected in the MS/MS spectrum *C. coli* 73  $\Delta$ *cstIV*-SF3 (Fig. 3b).  
102 Thus, suggesting the role of *cstIV* in the biosynthesis of diNAc-nonulosonate LOS in *C. coli*  
103 73.

## 104 DISCUSSION

105 *C. jejuni*. *C. jejuni* GT-42 were the first glycosyltransferases from this CAZy family to be  
106 enzymatically and structurally characterized; CstII is mono/bifunctional exhibiting  $\alpha$ 2,3-/ $\alpha$ 2,8-  
107 sialyltransferase activity, while CstI and CstIII are monofunctional  $\alpha$ 2,3- sialyltransferases <sup>21-</sup>  
108 <sup>24</sup>. The activity of CstII and CstIII has been shown to be essential for the biosynthesis  
109 ganglioside-like LOS structures, which are linked to GBS onset <sup>12, 24</sup>. Despite the importance  
110 of GT-42 enzymes in virulence and pathogenesis <sup>25-28</sup>, the activity of these glycosyltransferases  
111 has not been explored in other *Campylobacter* species. Approximately 29% of *C. coli* genomes  
112 have been found to contain a GT-42 encoding gene within the LOS biosynthesis locus <sup>19</sup>. While  
113 *cstVI* was the most common LOS associated GT-42 encoding gene in *C. coli*, in 99% of the  
114 analysed genomes it was observed to be present as a pseudo gene. Thus, we focused our  
115 attention on the role of *cstIV* and *cstV* in LOS biosynthesis. Until recently, *cstV* had been solely  
116 identified in the genome of *C. coli* 76339 <sup>20</sup>. However, in a systematic screen of publicly  
117 available *C. coli* genomes several *cstV* positive strains were identified <sup>19</sup>. *C. coli* 76339 crude  
118 protein extracts were tested for sialyltransferase activity as Neu5Ac had been previously

119 detected in the strain's LOS<sup>20</sup>. Monosialyltransferase activity was initially detected, but was  
120 found to be due to activity of CstI. As in *C. jejuni*, *C. coli* 76339 *cstI* is located outside the LOS  
121 biosynthesis locus and encodes a  $\alpha$ 2,3- sialyltransferase which has no role in LOS biosynthesis  
122<sup>20,21</sup>. No sialyltransferase activity was detected on the protein extracts of the *cstI* mutant strain.  
123 However, transcriptomic analysis showed polycistronic expression of LOS biosynthesis genes  
124 indicating the active expression of *cstV*. Similarly, recombinant CstV exhibited no detectable  
125 activity on any of the tested acceptors. Deletion of *neuB1* or *cstV* resulted in identical LOS  
126 electrophoretic profiles. Additionally, LC-MS analysis showed that deletion of *cstV* resulted in  
127 the loss 2 Hex and 1 NeuAc. Thus, it is probable that *cstV* is associated to *C. coli* 76339 LOS  
128 sialylation. Yet, further studies are required to identified CstV natural acceptor and corroborate  
129 its activity *in vitro*.

130 After *cstVI*, *cstIV* is the most common orthologue being present in ~38% of the genomes  
131 positive for a LOS associated GT-42. Previously, no evidence of Neu5Ac had been found in  
132 the LOS of strains expressing *cstIV*<sup>29</sup>. This was to be expected as Neu5Ac biosynthesis genes  
133 are rarely present in strains carrying *cstIV*<sup>19</sup>. Furthermore, no sialyltransferase activity was  
134 detected neither in *C. coli* 65 and 73 protein extracts nor in recombinant CstIV. Thus, we  
135 assumed that CstIV was a cryptic, possibly inactive, sialyltransferase with no role in LOS  
136 biosynthesis. Nevertheless, deletion of *cstIV* in *C. coli* 65 and 73 resulted in a truncated LOS.  
137 Sequence alignment of CstIV with previously characterized GT42 sialyltransferases revealed  
138 numerous amino acid substitutions at conserved positions (Suppl. Fig. 6)<sup>30</sup>. Additionally,  
139 superimposition of CstIV on *C. jejuni* CstII structure identified various substitutions at amino  
140 acids involved in substrate interactions<sup>23, 31-33</sup>. Interestingly, most substitutions predicted to  
141 impact CstIV were in the amino acids associated with CMP-Neu5Ac, particularly with the  
142 Neu5Ac moiety. Moreover, these substitutions were conserved in multiple CstIV orthologues  
143<sup>23, 32, 33</sup>. Altogether, results pointed at the possibility of an alternative sugar donor for CstIV.

144 Detection of a diNAc-nonulosonate residue in *C. coli* 73 WT LOS and its absence in *C. coli* 73  
145  $\Delta$ *cstIV*-SF3 prompted us to investigate genes potentially linked to the synthesis of this residue.  
146 In *C. coli*, *neuB2* (*ptmC*, *legI*) and *neuB3* (*pseI*) are conserved flagella glycosylation genes  
147 involved in the synthesis of legionaminic and pseudaminic acid derivatives, respectively<sup>34-40</sup>.  
148 Deletion of *neuB2* had no impact on *C. coli* 73 LOS electrophoretic mobility (Suppl. Fig. 7),  
149 implying that *neuB2* is not involved in the synthesis of CstIV substrate. Despite repetitive  
150 attempts, no viable *C. coli* 73  $\Delta$ *neuB3* mutants were obtained. Although *neuB3* deletion has  
151 been successful in *C. coli* VC167, disruption of flagellin glycosylation and potentially  
152 truncation of the LOS might have resulted in a lethal phenotype for *C. coli* 73<sup>40</sup>. In sum, it is  
153 tempting to speculate that the diNAc-nonulosonate residue in *C. coli* 73 WT corresponds to  
154 pseudaminic acid. However, the nature of this residue cannot be inferred from MS/MS spectra  
155 alone, since many diNAc-nonulosonate variants have been identified<sup>41</sup>. Thus, this task is still  
156 under investigation.

## 157 **Conclusion**

158 Due to its close relatedness to *C. jejuni* and large horizontal gene transfer between both species,  
159 *C. coli* glycobiology has been largely neglected. Similarly to *C. jejuni*, *C. coli* appears to  
160 express LOS structures containing nonulosonate acids. The importance of this to *C. coli*  
161 ecology and host-pathogen interaction remains to be explore.

## 162 **METHODS**

163 **Bacterial strains, plasmids, and growth conditions.** Bacterial strains used in this study are  
164 listed in Supplemental Table 1. *C. coli* cultivation and DNA isolation were carried out as  
165 previously described, unless specified otherwise<sup>20</sup>.

166 **Construction of  $\Delta$ *cstIV*,  $\Delta$ *cstV*,  $\Delta$ *cstI*, and  $\Delta$ *neuB* mutants.**



167 Chromosomal mutant strains of *C. coli* 76339 (*cstV*, *cstI*, and *neuB1*)<sup>19,20</sup>, *C. coli* 73 (*cstIV*  
168 and *neuB2*), and *C. coli* (*cstIV*)<sup>19,29</sup> were generated by homologous recombination with suicide  
169 vectors containing genes inactivated by the insertion of an antibiotic resistance cassette (All  
170 recombinant plasmids and primers are shown in Supplemental material). The genes *cstV*, *cstIV*,  
171 *neuB1*, and *neuB2* were inactivated by the insertion of an erythromycin resistance cassette  
172 (EryC)<sup>42</sup>, while *cstI* was disrupted with a chloramphenicol acetyltransferase cassette (CAT)<sup>43</sup>.  
173 Preparation of electrocompetent cells and transformation was done as previously described<sup>43</sup>.  
174 Selection of  $\Delta$ *cstIV*,  $\Delta$ *cstV*,  $\Delta$ *neuB1* and  $\Delta$ *neuB2* mutants was done on nutrient blood agar  
175 (NBA) supplemented with 10  $\mu$ g ml<sup>-1</sup> of erythromycin, while  $\Delta$ *cstI* mutants were selected in  
176 NBA supplemented with 12.5  $\mu$ g ml<sup>-1</sup> of chloramphenicol. Homologous recombination of all  
177 mutants was verified by PCR.

#### 178 **Complementation of *C. coli* 76339 $\Delta$ *cstV*-SR**

179 Complementation of *C. coli* 76339  $\Delta$ *cstV*-SR4 was done in *cis* by integration of *cstV* under the  
180 active promoter of gamma glutamyltranspeptidase (*ggt*). The *ggt* is an accessory gene in *C.*  
181 *coli* and has no role in LOS biosynthesis. Additionally, the *ggt* locus is located far from the  
182 LOS locus and its deletion does not induce a loss in bacterial viability. The suicide vector  
183 containing an inactivated *ggt* by the insertion of a *cstV* and CAT (pGEM-*ggt*-*cstV*-CAT) was  
184 used to transform *C. coli* 76339  $\Delta$ *cstV*-SR4 electrocompetent cells as above. Transformants  
185 were selected on NBA supplemented with 12.5  $\mu$ g ml<sup>-1</sup> of chloramphenicol. Homologous  
186 recombination of mutants was verified by testing for GGT activity as before<sup>44</sup>.

187 **LOS silver staining.** LOS profiles were assessed by silver staining as described earlier<sup>29</sup>.  
188 Additionally, LOS sensitivity to neuraminidase was assessed. Crude LOS was treated with 2  
189 IU/ml of *Clostridium perfringens* neuraminidase (Sigma-Aldrich) overnight at 37 °C.

#### 190 **Mass spectrometry analysis of *C. coli* LOS composition.**

191 Following 1% formaldehyde in PBS (pH 7.4) treatment, *C. coli* cell pellets were washed 3X in  
192 PBS and lyophilized. Then, cells were dehydrated by a sequence of 2 washes in each of 70%  
193 ethanol (in PBS), 100% ethanol, and 100% acetone. The dehydrated cells were treated with  
194 proteinase K, RNase A, and DNase I as previously described <sup>45</sup>. Digested cells were then  
195 treated with hydrazine to cleave *O*-linked fatty acids <sup>45</sup>. The *O*-deacylated LOS samples were  
196 analysed by LC-MS by coupling a Waters Premier Q-TOF with an Agilent 1260 capillary LC  
197 system. Mass spectrometry was operated in positive-ion detection mode. Liquid  
198 chromatography separation was done on an Agilent Eclipse XDB C8 column (5 $\mu$ m, 50 x 1mm).  
199 The flow rate was 20  $\mu$ l/min. Solvent A: aqueous 0.2% formic acid/0.028% ammonia; solvent  
200 B: Isopropanol with 0.2% formic acid/0.028% ammonia. The following gradient was used: 0-  
201 2 min. 10% B, 2-16 min linear gradient to 85% B, 16-25 min. 85% B, 25-30 min., and  
202 equilibration at 10% B.

203

204 **REFERENCES**

205

- 206 1. Angata, T. & Varki, A. Chemical diversity in the sialic acids and related  $\alpha$ -keto acids: an  
207 evolutionary perspective. *Chem. Rev.* **102**, 439-470 (2002).
- 208 2. Gamian, A., Jones, C., Lipiński, T., Korzeniowska-Kowal, A. & Ravenscroft, N. Structure  
209 of the sialic acid-containing O-specific polysaccharide from *Salmonella enterica* serovar  
210 Toucra O48 lipopolysaccharide. *Eur J Biochem* **267**, 3160-3167 (2000).
- 211 3. Hood, D. W. *et al.* Sialic acid in the lipopolysaccharide of *Haemophilus influenzae*: strain  
212 distribution, influence on serum resistance and structural characterization. *Mol Microbiol* **33**,  
213 679-692 (1999).
- 214 4. Kahler, C. M. *et al.* The ( $\alpha$ 2 $\rightarrow$ 8)-linked polysialic acid capsule and lipooligosaccharide  
215 structure both contribute to the ability of serogroup B *Neisseria meningitidis* to resist the  
216 bactericidal activity of normal human serum. *Infect Immun* **66**, 5939-5947 (1998).
- 217 5. Lo, H., Tang, C. M. & Exley, R. M. Mechanisms of avoidance of host immunity by  
218 *Neisseria meningitidis* and its effect on vaccine development. *The Lancet Infectious Diseases*  
219 **9**, 418-427 (2009).
- 220 6. Louwen, R. *et al.* The sialylated lipooligosaccharide outer core in *Campylobacter jejuni* is  
221 an important determinant for epithelial cell invasion. *Infect Immun* **76**, 4431-4438 (2008).
- 222 7. Lombard, V., Golaconda Ramulu, H., Drula, E., Coutinho, P. M. & Henrissat, B. The  
223 carbohydrate-active enzymes database (CAZy) in 2013. *Nucleic Acids Res.* **42**, D490-D495  
224 (2013).
- 225 8. Parker, C. T., Gilbert, M., Yuki, N., Endtz, H. P. & Mandrell, R. E. Characterization of  
226 lipooligosaccharide-biosynthetic loci of *Campylobacter jejuni* reveals new  
227 lipooligosaccharide classes: evidence of mosaic organizations, *J. Bacteriol.* **190**, 5681-5689  
228 (2008).
- 229 9. Gilbert, M. *et al.* The genetic bases for the variation in the lipo-oligosaccharide of the  
230 mucosal pathogen, *Campylobacter jejuni*. *J. Biol. Chem.* **277**, 327-337 (2002).
- 231 10. Richards, V. P., Lefébure, T., Pavinski Bitar, P. D. & Stanhope, M. J. Comparative  
232 characterization of the virulence gene clusters (lipooligosaccharide [LOS] and capsular  
233 polysaccharide [CPS]) for *Campylobacter coli*, *Campylobacter jejuni* subsp. *jejuni* and  
234 related *Campylobacter* species. *Infect Genet Evol* **14**, 200-213 (2013).
- 235 11. Godschalk, P. C. R. *et al.* Structural characterization of *Campylobacter*  
236 *jejuni* lipooligosaccharide outer cores associated with Guillain-Barré and Miller Fisher  
237 syndromes. *Infect. Immun.* **75**, 1245-1254 (2007).

- 238 12. Godschalk, P., Heikema, A. & Gilbert, M. e. a. The crucial role of *Campylobacter*  
239 *jejuni* genes in anti-ganglioside antibody induction in Guillain-Barré syndrome. *J. Clin.*  
240 *Invest.* **114**, 1659-1665 (2004).
- 241 13. Houliston, R. S. *et al.* Lipooligosaccharide of *Campylobacter jejuni*: similarity with  
242 multiple types pf mammalian glycans beyond gangliosides. *J Biol Chem* **286**, 12361-12370  
243 (2011).
- 244 14. Yuki, N. Carbohydrate mimicry: a new paradigm of autoimmune diseases. *Curr. Opin.*  
245 *Immunol.* **17**, 577-582 (2005).
- 246 15. Wulffen, H. v., Hartard, C. & Scharein, E. Seroreactivity to *Campylobacter jejuni* and  
247 gangliosides in patients with Guillain-Barré syndrome. *J. Infect. Dis.* **170**, 828-833 (1994).
- 248 16. Funakoshi, K., Koga, M., Takahashi, M., Hirata, K. & Yuki, N. *Campylobacter coli*  
249 enteritis and Guillain-Barré syndrome: No evidence of molecular mimicry and serological  
250 relationship. *Journal of the Neurological Sciences* **246**, 163-168 (2006).
- 251 17. Bersudskya, M., Rosenbergb, P., Rudenskyc, B. & Wirguin, I. Lipopolysaccharides of a  
252 *Campylobacter coli* isolate from a patient with Guillain-Barre syndrome display ganglioside  
253 mimicry. *Neuromuscular Disorders* **10**, 182-186 (2000).
- 254 18. van Belkum, A. *et al.* Can *Campylobacter coli* induce Guillain-Barré syndrome?  
255 *European Journal of Clinical Microbiology & Infectious Diseases* **28**, 557-560 (2009).
- 256 19. Culebro, A., Machado, M. P., Carriço, J. A. & Rossi, M. Origin, evolution, and  
257 distribution of the molecular machinery for biosynthesis of sialylated lipooligosaccharide  
258 structures in *Campylobacter coli*. *bioRxiv* (2017).
- 259 20. Skarp-de Haan, C. *et al.* Comparative genomics of unintrogressed *Campylobacter coli*  
260 clades 2 and 3. *BMC Genomics* **15**, 129 (2014).
- 261 21. Gilbert, M. *et al.* Biosynthesis of ganglioside mimics in *Campylobacter jejuni*  
262 OH4384: identification of the glycosyltransferase genes, enzymatic synthesis of model  
263 compounds, and characterization of nanomole amounts by 600-MHz 1H and 13C NMR  
264 analysis . *J Biol Chem* **275**, 3896-3906 (2000).
- 265 22. Chiu, C. P. C. *et al.* Structural analysis of the a-2,3-sialyltransferase Cst-I from  
266 *Campylobacter jejuni* in apo and substrate-analogue bound forms. *Biochemistry* **46**, 7196-  
267 7204 (2007).
- 268 23. Chiu, C. P. C. *et al.* Structural analysis of the sialyltransferase CstII from *Campylobacter*  
269 *jejuni* in complex with a substrate analog. *Nat Struct Mol Biol* **11**, 163-170 (2004).
- 270 24. Guerry, P., Ewing, C. P., Hickey, T. E., Prendergast, M. M. & Moran, A. P. Sialylation of  
271 lipooligosaccharide cores affects immunogenicity and serum resistance of *Campylobacter*  
272 *jejuni*. *Infection and immunity* **68**, 6656-6662 (2000).

- 273 25. Mortensen, N. P. *et al.* Sialylation of *Campylobacter jejuni* lipo-oligosaccharides is  
274 associated with severe gastro-enteritis and reactive arthritis. *Microb. Infect.* **11**, 988-994  
275 (2009).
- 276 26. Kuijf, M. L. *et al.* TLR4-mediated sensing of *Campylobacter jejuni* by dendritic cells is  
277 determined by sialylation. *J. Immunol.* **185**, 748-755 (2010).
- 278 27. Huizinga, R. *et al.* Sialylation of *Campylobacter jejuni* endotoxin promotes dendritic  
279 cell-mediated B cell responses through CD14-dependent production of IFN- $\beta$  and TNF- $\alpha$ . *J.*  
280 *Immunol.* **191**, 5636-5645 (2013).
- 281 28. Huizinga, R. *et al.* Sialylation of *Campylobacter jejuni* lipo-oligosaccharides: Impact on  
282 phagocytosis and cytokine production in mice. *PLoS ONE* **7**, e34416 (2012).
- 283 29. Culebro, A. *et al.* Large Sequence Diversity within the Biosynthesis Locus and Common  
284 Biochemical Features of *Campylobacter coli* Lipooligosaccharides. *Journal of Bacteriology*  
285 **198**, 2829-2840 (2016).
- 286 30. Schur, M. J., Lameignere, E., Strynadka, N. C. & Wakarchuk, W. W. Characterization of  
287  $\alpha$ 2,3- and  $\alpha$ 2,6-sialyltransferases from *Helicobacter acinonychis*. *Glycobiology* **22**, 997-1006  
288 (2012).
- 289 31. Chan, P. H. W. *et al.* NMR spectroscopic characterization of the sialyltransferase CstII  
290 from *Campylobacter jejuni*: histidine 188 is the general base. *Biochemistry (N. Y.)* **48**,  
291 11220-11230 (2009).
- 292 32. Lee, H. J. *et al.* Structural and kinetic analysis of substrate binding to the sialyltransferase  
293 Cst-II from *Campylobacter jejuni*. *J Biol Chem* **286**, 35922-35932 (2011).
- 294 33. Aharoni, A. *et al.* High-throughput screening methodology for the directed evolution of  
295 glycosyltransferases. *Nat Meth* **3**, 609-614 (2006).
- 296 34. Schoenhofen, I. C., McNally, D. J., Brisson, J. & Logan, S. M. Elucidation of the CMP-  
297 pseudaminic acid pathway in *Helicobacter pylori*: synthesis from UDP-N-acetylglucosamine  
298 by a single enzymatic reaction. *Glycobiology* **16**, 8C-14C (2006).
- 299 35. Schoenhofen, I. C., Vinogradov, E., Whitfield, D. M., Brisson, J. & Logan, S. M. The  
300 CMP-legionaminic acid pathway in *Campylobacter*: Biosynthesis involving novel GDP-  
301 linked precursors. *Glycobiology* **19**, 715-725 (2009).
- 302 36. Sundaram, A. *et al.* Characterization of N-acetylneuraminic acid synthase isoenzyme 1  
303 from *Campylobacter jejuni*. *Biochem. J.* **383**, 83 (2004).
- 304 37. Linton, D. *et al.* Multiple N-acetyl neuraminic acid synthetase (*neuB*) genes in  
305 *Campylobacter jejuni*: identification and characterization of the gene involved in sialylation  
306 of lipo-oligosaccharide. *Mol. Microbiol.* **35**, 1120-1134 (2000).
- 307 38. Lewis, A. L. *et al.* Innovations in host and microbial sialic acid biosynthesis revealed by  
308 phylogenomic prediction of nonulosonic acid structure. *Proceedings of the National Academy*  
309 *of Sciences* **106**, 13552-13557 (2009).

- 310 39. McNally, D. J. *et al.* Targeted metabolomics analysis of *Campylobacter coli* VC167  
311 reveals legionaminic acid derivatives as novel flagellar glycans. *J Biol Chem* **282**, 14463-  
312 14475 (2007).
- 313 40. Logan, S. M., Kelly, J. F., Thibault, P., Ewing, C. P. & Guerry, P. Structural  
314 heterogeneity of carbohydrate modifications affects serospecificity of *Campylobacter*  
315 flagellins. *Mol Microbiol* **46**, 587-597 (2002).
- 316 41. Varki, A., Schnaar, R. L. & Schauer, R. in *Essentials of Glycobiology* (ed 3rd et al.) 179-  
317 195 (by The Consortium of Glycobiology Editors, La Jolla, California, Cold Spring Harbor  
318 (NY), 2017).
- 319 42. Thomas, M. T. *et al.* Two respiratory enzyme systems in *Campylobacter jejuni* NCTC  
320 11168 contribute to growth on L-lactate. *Environ. Microbiol.* **13**, 48-61 (2011).
- 321 43. Olkkola, S., Culebro, A., Juntunen, P., Hänninen, M. & Rossi, M. Functional genomics in  
322 *Campylobacter coli* identified a novel streptomycin resistance gene located in a hypervariable  
323 genomic region. *Microbiology* **162**, 1157-1166 (2016).
- 324 44. de Haan, C. P. A., Llarena, A., Revez, J. & Hänninen, M. Association of *Campylobacter*  
325 *jejuni* Metabolic Traits with Multilocus Sequence Types. *Applied and Environmental*  
326 *Microbiology* **78**, 5550-5554 (2012).
- 327 45. Li, J. *et al.* Electrophoresis-assisted open-tubular liquid chromatography/mass  
328 spectrometry for the analysis of lipooligosaccharide expressed by *Campylobacter jejuni*.  
329 *Electrophoresis* **26**, 3360-3368 (2005).

330

331

332

333 **ACKNOWLEDGEMENTS**

334 This research project was supported by the University of Helsinki research grant n.  
335 313/51/2013, and the Walter Ehrström Foundation travel grant. A. C was supported by the  
336 Microbiology and Biotechnology graduate program from the University of Helsinki. The  
337 authors wish to thank Marja-Liisa Hänninen for providing the strains and Arnoud HM van Vliet  
338 for providing the erythromycin resistance cassette. We thank Denis Brochu for help with the  
339 preparation of the samples for mass spectrometry analysis and data presentation.

340 **CONTRIBUTIONS**

341 A.C and M.R designed and coordinated the study. A.C generated all *C. coli* mutants. A.C,  
342 M.G, and W.W participated in enzymatic assays. J.S and J.L performed LC-MS analysis. J.S,  
343 J.L, and M.G interpreted LC-MS data. A.C drafted the manuscript. All authors have  
344 contributed to data interpretation, have critically reviewed the manuscript, and approved the  
345 final version as submitted.

346 **ADDITIONAL INFORMATION**

347 The authors declare that they have no competing interests

348

349 **Figure Legends**

350 **Figure 1.** Electrophoresis mobility comparison of *C. coli* LOS of WT and mutant strains. *C.*

351 *jejuni* 81-176 was used as a reference. Samples marked with an asteric were neuraminidase

352 treated.

353 **Figure 2.** MS/MS spectra for the precursor ions of O-deacylated LOS from (a) *C. coli* 76339

354 WT,  $m/z$  1064.0; (b) *C. coli* 76339  $\Delta$ cstI,  $m/z$  1064.0; and (c) *C. coli* 76339  $\Delta$ cstV,  $m/z$

355 1295.4.

356 **Figure 3.** MS/MS spectra for the precursor ions of O-deacylated LOS from (a) *C. coli* strain

357 73 WT,  $m/z$  1072.4; (b) *C. coli* 73  $\Delta$ cstIV-SF3,  $m/z$  1566.0.



358 **Table X.** LC-MS in positive mode data and proposed compositions for *O*-deacylated LOS of *C. coli* 76339 (strain 51) and corresponding *cstI* and *cstV* knock-  
 359 out mutants.  
 360

| Strain               | Observed ions |                    |               |                   | Molecular mass |                         | Proposed compositions                                                                                                    |                            |                          |
|----------------------|---------------|--------------------|---------------|-------------------|----------------|-------------------------|--------------------------------------------------------------------------------------------------------------------------|----------------------------|--------------------------|
|                      | $[M+3H]^3_+$  | $[M+2H+NH_4]^{3+}$ | $[M+2H]^{2+}$ | $[M+H+NH_4]^{2+}$ | Observed       | Calculated <sup>i</sup> | Core oligosaccharide                                                                                                     | Phosphorylation in lipid A | Acylation in lipid A     |
| wt                   | 1063.43       | 1069.11            |               |                   | 3187.30        | 3187.35                 | Kdo <sub>2</sub> •Hep <sub>2</sub> •Hex <sub>4</sub> •HexNAc <sub>1</sub> •NeuAc <sub>1</sub>                            | <i>PP</i> Etn              | 3 <i>N</i> -(C14:0 3-OH) |
|                      | 1104.43       | 1110.11            |               |                   | 3310.30        | 3310.36                 | Kdo <sub>2</sub> •Hep <sub>2</sub> •Hex <sub>4</sub> •HexNAc <sub>1</sub> •NeuAc <sub>1</sub> • <i>PE</i> t <sub>1</sub> | <i>PP</i> Etn              | 3 <i>N</i> -(C14:0 3-OH) |
|                      | 1138.48       | 1144.17            |               |                   | 3412.46        | 3412.56                 | Kdo <sub>2</sub> •Hep <sub>2</sub> •Hex <sub>4</sub> •HexNAc <sub>1</sub> •NeuAc <sub>1</sub>                            | <i>PP</i> Etn              | 4 <i>N</i> -(C14:0 3-OH) |
|                      | 1179.51       | 1185.17            |               |                   | 3535.51        | 3535.57                 | Kdo <sub>2</sub> •Hep <sub>2</sub> •Hex <sub>4</sub> •HexNAc <sub>1</sub> •NeuAc <sub>1</sub> • <i>PE</i> t <sub>1</sub> | <i>PP</i> Etn              | 4 <i>N</i> -(C14:0 3-OH) |
| $\Delta$ <i>cstI</i> | 1063.44       | 1069.11            |               |                   | 3187.31        | 3187.35                 | Kdo <sub>2</sub> •Hep <sub>2</sub> •Hex <sub>4</sub> •HexNAc <sub>1</sub> •NeuAc <sub>1</sub>                            | <i>PP</i> Etn              | 3 <i>N</i> -(C14:0 3-OH) |
|                      | 1104.44       | 1110.12            |               |                   | 3310.33        | 3310.36                 | Kdo <sub>2</sub> •Hep <sub>2</sub> •Hex <sub>4</sub> •HexNAc <sub>1</sub> •NeuAc <sub>1</sub> • <i>PE</i> t <sub>1</sub> | <i>PP</i> Etn              | 3 <i>N</i> -(C14:0 3-OH) |
|                      | 1138.51       | 1144.18            |               |                   | 3412.52        | 3412.56                 | Kdo <sub>2</sub> •Hep <sub>2</sub> •Hex <sub>4</sub> •HexNAc <sub>1</sub> •NeuAc <sub>1</sub>                            | <i>PP</i> Etn              | 4 <i>N</i> -(C14:0 3-OH) |
|                      | 1179.51       | 1185.20            |               |                   | 3535.55        | 3535.57                 | Kdo <sub>2</sub> •Hep <sub>2</sub> •Hex <sub>4</sub> •HexNAc <sub>1</sub> •NeuAc <sub>1</sub> • <i>PE</i> t <sub>1</sub> | <i>PP</i> Etn              | 4 <i>N</i> -(C14:0 3-OH) |
| $\Delta$ <i>cstV</i> |               |                    | 1225.56       | 1234.09           | 2449.14        | 2449.14                 | Kdo <sub>2</sub> •Hep <sub>2</sub> •Hex <sub>2</sub> •HexNAc <sub>1</sub>                                                | <i>P</i>                   | 3 <i>N</i> -(C14:0 3-OH) |
|                      |               |                    | 1287.08       | 1295.56           | 2572.13        | 2572.15                 | Kdo <sub>2</sub> •Hep <sub>2</sub> •Hex <sub>2</sub> •HexNAc <sub>1</sub>                                                | <i>PP</i> Etn              | 3 <i>N</i> -(C14:0 3-OH) |
|                      |               |                    | 1348.58       |                   | 2695.14        | 2695.16                 | Kdo <sub>2</sub> •Hep <sub>2</sub> •Hex <sub>2</sub> •HexNAc <sub>1</sub> • <i>PE</i> t <sub>1</sub>                     | <i>PP</i> Etn              | 3 <i>N</i> -(C14:0 3-OH) |

361  
 362

<sup>i</sup> Isotope-monoisotopic mass units were used for calculation of molecular mass values based on proposed compositions as follows: HexN, 161.0688; HexN3N, 160.0848; C14:0 3-OH, 226.1933; *PE*t<sub>1</sub>, 123.0085; *P*, 79.9663; Kdo, 220.0583; Hep, 192.0634; Hex, 162.0528; HexNAc, 203.0794; NeuAc, 291.0954; H<sub>2</sub>O, 18.0106.

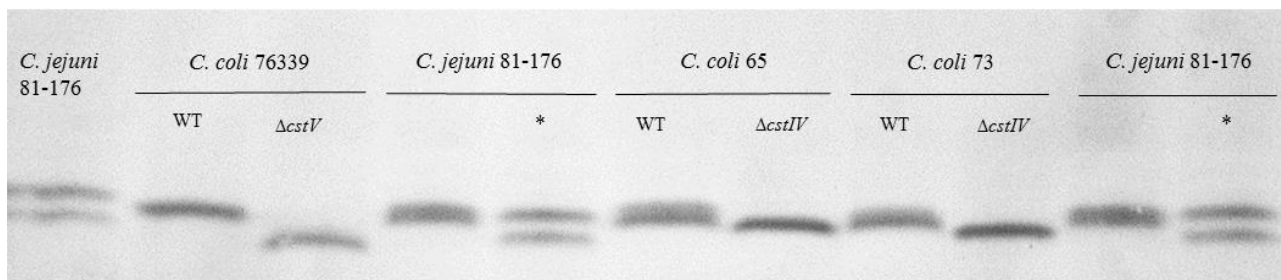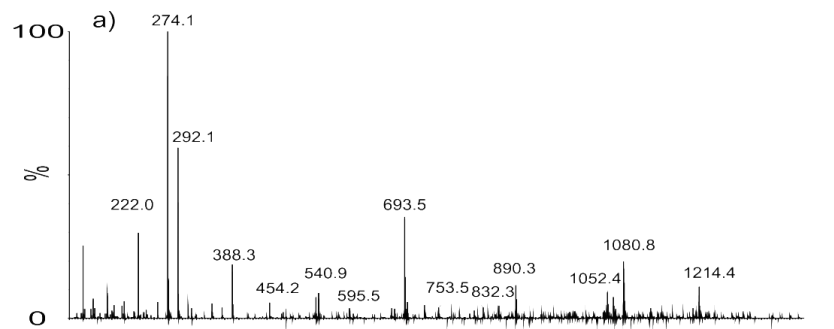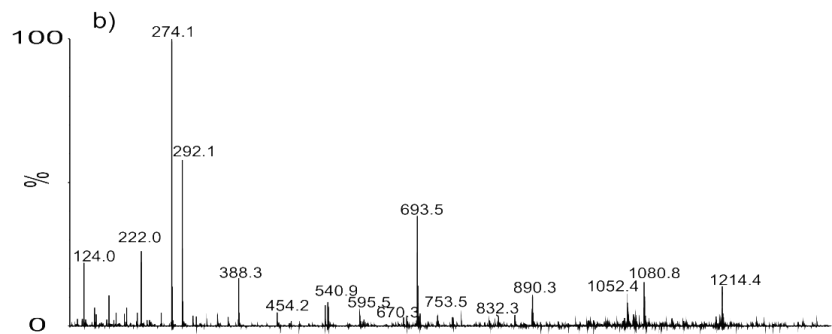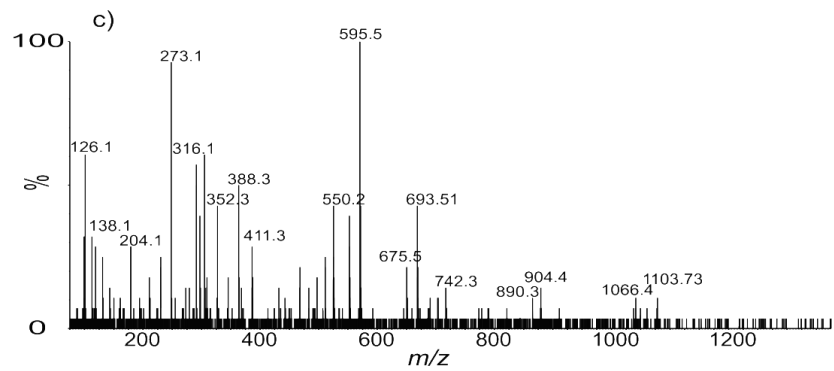

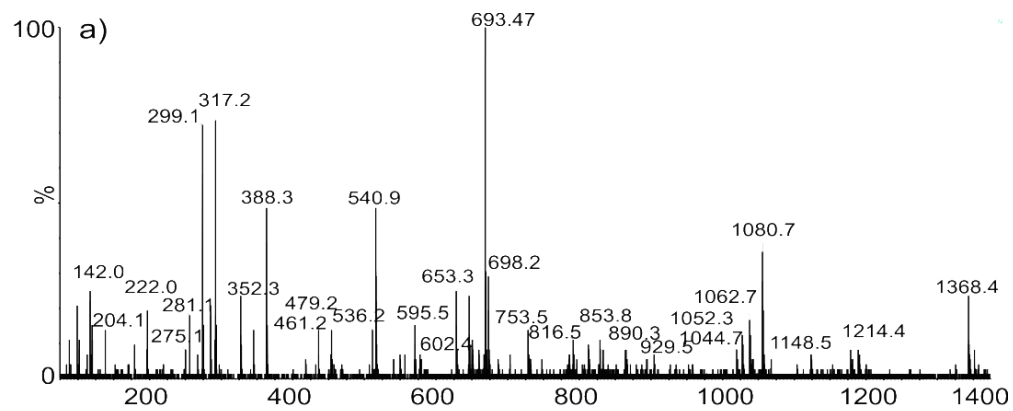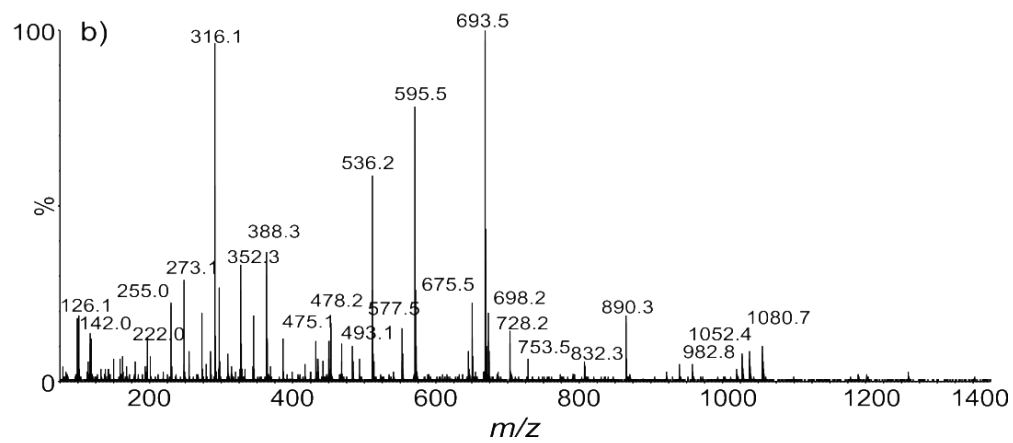

Source: https://www.biorxiv.org/content/10.1101/254235v1.full.pdf
