1 Genetics behind the biosynthesis of nonulosonic acid containing lipooligosaccharides in

2 *Campylobacter coli*

3 Alejandra Kolehmainen<sup>a#</sup>, Mirko Rossi<sup>a,b</sup>, Jacek Stupak<sup>c</sup>, Jianjun Li<sup>c</sup>, Michel Gilbert<sup>c</sup>,

4 Warren Wakarchuk<sup>d</sup>,

5 <sup>a</sup>Department of Food Hygiene and Environmental Health, Faculty of Veterinary Medicine,

6 University of Helsinki, Helsinki, Finland.

7 <sup>b</sup>European Food Safety Authority, Parma, Italy

8 <sup>c</sup>Human Health Therapeutics Research Centre, National Research Council Canada, Ottawa,

9 Canada

10 <sup>d</sup>Department of Chemistry and Biology, Ryerson University, Toronto, Canada

11 Running Title: Function of *C. coli* GT-42 glycosyltransferases

12

13 #Author for Correspondence: Alejandra Kolehmainen, [kei@hotmail.fi](mailto:kei@hotmail.fi)

14 W.W., M.G. and M.R. contributed equally to this work.

15 **ABSTRACT**

16 *Campylobacter jejuni* and *Campylobacter coli* are the most common cause of bacterial  
17 gastroenteritis in the world. Ganglioside mimicry by *C. jejuni* lipooligosaccharide (LOS) is  
18 the triggering factor of Guillain-Barré syndrome (GBS), an acute polyneuropathy.  
19 Sialyltransferases from the glycosyltransferase (GT) family 42 are essential for the  
20 expression of ganglioside mimics in *C. jejuni*. Recently, two novel GT-42 genes, *cstIV* and  
21 *cstV*, have been identified in *C. coli*. Despite being present in ~11% of currently available *C.*  
22 *coli* genomes, the biological role of *cstIV* and *cstV* is unknown. In the present study, mutation  
23 studies in two strains expressing either *cstIV* or *cstV* were performed and mass spectrometry  
24 was used to investigate differences in the chemical composition of LOS. Attempts were made  
25 to identify donor and acceptor molecules using *in vitro* activity tests with recombinant GT-42  
26 enzymes. Here, we show that CstIV and CstV are involved in *C. coli* LOS biosynthesis. In  
27 particular, *cstV* is associated with LOS sialylation, while *cstIV* is linked to the addition of a  
28 diacetylated nonulosonic acid residue.

29 **IMPORTANCE**

30 Despite being a major foodborne pathogen, *Campylobacter coli* glycobiology has been  
31 largely neglected. The genetic makeup of the *C. coli* lipooligosaccharide biosynthesis locus  
32 was largely unknown until recently. *C. coli* harbour a large set of genes associated to  
33 lipooligosaccharide biosynthesis, including several putative glycosyltransferases involved in  
34 the synthesis of sialylated lipooligosaccharide in *Campylobacter jejuni*. In the present study,  
35 *C. coli* was found to express lipooligosaccharide structures containing sialic acid and other  
36 nonulosonate acids. These findings have a strong impact in understanding *C. coli* ecology,  
37 host-pathogen interaction, and pathogenesis.

## 38 INTRODUCTION

39 Nonulosonic acids are a highly diverse family of nine-carbon  $\alpha$ -keto acids. The most  
40 naturally abundant nonulosonic acids are the sialic acids (*N*-acetylneuraminic acid, Neu5Ac)  
41 and derivatives (1). Initially thought to be only a deuterostome feature, sialic acids have been  
42 found in virulence associated bacterial cell surface glycoconjugates such as  
43 lipopolysaccharides, capsules, pili, and flagella (2-4). Furthermore, these sialylated structures  
44 have been shown to influence pathogenesis through immune evasion, adhesion, and invasion  
45 (5, 6). Sialyltransferases catalyse the transfer of sialic acid from cytidine-5'-monophospho-*N*-  
46 acetylneuraminic acid (CMP-Neu5Ac) to an acceptor and are key in the synthesis of  
47 sialoglycoconjugates. Known sialyltransferases have been classified into seven distinct CAZY  
48 (Carbohydrate-active enzymes database) glycosyltransferase (GT) families; GT-29, GT-38,  
49 GT-42, GT-52, GT-80, GT-97, and GT-100 (7). In *Campylobacter jejuni*, the most common  
50 cause of bacterial gastroenteritis, CMP-Neu5Ac biosynthesis (*neuA*, *neuB*, and *neuC*) and  
51 GT-42 genes are present in the lipooligosaccharide (LOS) biosynthesis locus classes A, B, C,  
52 M, R, and V (8-10). *C. jejuni* strains carrying one of these genetic classes synthesize LOS  
53 structures generally resembling gangliosides (9, 11-13). In some cases, infection with a *C.*  
54 *jejuni* strain expressing ganglioside-like LOS induces production of cross-reactive anti-  
55 ganglioside antibodies. This leads to the development of Guillian-Barré syndrome (GBS); an  
56 acute autoimmune polyradiculoneuropathy disease with ~5% mortality rate (14).

57 *C. coli*, the second most common cause of campylobacteriosis, has also been isolated from  
58 GBS patients (15-18). Nevertheless, the role of *C. coli* in GBS has largely remained unclear  
59 due to the seemingly absence of key elements for the synthesis of ganglioside-like LOS (i.e.  
60 GT-42 and *neuABC* genes). Recently, three newly identified *C. coli* LOS-associated GT-42  
61 genes were reported in the LOS biosynthesis locus: *cstIV*, *cstV*, and *cstVI* (10, 19, 20). While  
62 *cstVI* is generally found as a pseudogene, *cstIV* and *cstV* may potentially be involved in LOS

63 biosynthesis (19). In this manuscript we sought to explore the role of the newly identified  
64 GT-42 enzymes CstIV and CstV in *C. coli* LOS biosynthesis.

## 65 **RESULTS**

### 66 **CstIV and CstV are involved in LOS biosynthesis.**

67 The LOS of  $\Delta cstIV$  and  $\Delta cstV$  strains showed an increased mobility on silver stained SDS-  
68 PAGE gels relative to the WTs (Fig. 1). Thus, deletion of *cstV* in *C. coli* 76339 and *cstIV* in  
69 *C. coli* 73 resulted in a truncated LOS. The complemented *cstV* mutant exhibited two LOS  
70 bands on SDS-PAGE gels; the upper one corresponding to the WT LOS and the lower  
71 molecular weight band to the truncated LOS (Suppl. Fig. S1). This suggests that partial  
72 restoration of the phenotype was achieved upon complementation in *cis* of  $\Delta cstV$ -SR4.

73 Deletion of the second putative sialyltransferase of *C. coli* 76339, *cstI* located in the capsular  
74 locus, had no effect on LOS mobility on SDS-PAGE gel (data not shown).

75 Though complementation of  $\Delta cstIV$  strain was infeasible, owing to the absence of a suitable  
76 loci, it is unlikely that the mobility shift resulting from *cstIV* disruption was due to a polar  
77 effect, as *cstIV* is followed by genes that are transcribed in the opposite direction. While *cstIV*  
78 and *cstV* were found to be involved in LOS biosynthesis, neuraminidase treatment had no  
79 impact on LOS mobility (Suppl. Fig. S2).

### 80 ***C. coli* 76339 *neuB1* is involved in the biosynthesis of CstV substrate.**

81 Since no clear shift in the electrophoretic mobility of *C. coli* 76339 LOS was detected after  
82 neuraminidase treatment (Suppl. Fig. S2), the putative sialic acid synthase, *neuB1*, located  
83 downstream from *cstV* (Fig. 2) was knocked out to determine whether CMP-Neu5Ac was the  
84 donor molecule for CstV. The LOS of 76339  $\Delta neuB1$ -SR2 showed a similar profile to those  
85 of 76339  $\Delta cstV$ -SF1 and 76339  $\Delta cstV$ -SR4 (Suppl. Fig. S3). Thus, inactivation of *neuB1*

86 results in a seemingly similar LOS truncation to the one observed in  $\Delta cstV$  strains, suggesting  
87 the potential involvement of *neuB1* in the synthesis of the CstV donor.

88 *C. coli* 73 lacks Neu5Ac biosynthesis genes orthologues. However, as other *C. coli* strains, it  
89 synthesizes other nonulosonic acids through the activity of *neuB2* and *neuB3* genes. Deletion  
90 of *neuB2* had no impact on *C. coli* 73 LOS electrophoretic mobility (data not shown) and,  
91 despite repetitive attempts, no viable *C. coli* 73  $\Delta neuB3$  mutants were obtained.

## 92 **CstIV and CstV are associated to nonulosonate residues in *C. coli* LOS**

93 Predicted LOS compositions by LC-MS for *C. coli* 76339 WT and mutants are shown on  
94 Table 1. *C. coli* 76339 contains a core oligosaccharide linked via two 3-deoxy-D-manno-oct-  
95 2-ulosonic acid (Kdo) molecules to a lipid A molecule. The core oligosaccharide of *C. coli*  
96 76339 is composed of heptoses (Hep), hexoses (Hex), hexosamines (HexNAc), and NeuAc.  
97 The resulting MS/MS spectrum of  $m/z$  1064.0 obtained from the *O*-deacylated LOS of *C. coli*  
98 76339 WT revealed a single ion at  $m/z$  1214.4 corresponding to  $\text{Hex}_3\cdot\text{Hep}_2\cdot\text{PEtn}_1\cdot\text{KDO}_1$   
99 (Fig. 3a). The fragment ions at  $m/z$  1052.4 and 890.3 correspond to the additional loss of two  
100 Hex residues. The spectra also revealed ions that derived from lipid A,  $m/z$  693.5 and  $m/z$   
101 388.3 corresponding to  $\text{HexN}_3\text{N}_1\cdot\text{P}_1\cdot(\text{C14:0 3-OH})_2$  and  $\text{HexN}_3\text{N}_1\cdot(\text{C14:0 3-OH})_1$ ,  
102 respectively. The observation of fragment ions at  $m/z$  292.1 and 274.1 provided evidence for  
103 the presence of sialic acid on core region LOS. The MS/MS spectrum of precursor ion  $m/z$   
104 1064.0 from *C. coli* 76339  $\Delta cstI$  is similar to that from *C. coli* 76339 WT, in which the  
105 diagnostic ions for sialic acid were detected at  $m/z$  292.1 and 274.1 (Fig. 3b). However, no  
106 sialic acid was detected in the MS/MS spectrum *C. coli* 76339  $\Delta cstV$  (Fig. 3c). Thus, *cstV* is  
107 associated to the presence of NeuAc, while *cstI* plays no role in *C. coli* 76339 LOS  
108 biosynthesis.

109 A similar lipid A moiety was indicated by the MS/MS spectrum obtained from the *O*-  
110 deacylated LOS of *C. coli* strain 73 WT (Fig. 4a). The spectra also revealed ions that derived  
111 from lipid A,  $m/z$  693.5 and  $m/z$  388.3 corresponding to HexN3N<sub>1</sub>•P<sub>1</sub>•(C14:0 3-OH)<sub>2</sub> and  
112 HexN3N<sub>1</sub>•(C14:0 3-OH)<sub>1</sub>, respectively. The observation of fragment ions at  $m/z$  317.2 and  
113 299.1 provided evidence for the presence of a residue with a molecular weight of 334.2 Da or  
114 316.2 Da for its anhydrous form on core region LOS. These masses are consistent with free  
115 diNAc-nonulosonate and its conjugated form, respectively. However, these characteristic ions  
116 were not detected in the MS/MS spectrum *C. coli* 73  $\Delta$ *cstIV*-SF3 (Fig. 4b). Thus, suggesting  
117 the role of *cstIV* in the biosynthesis of diNAc-nonulosonate LOS in *C. coli* 73.

118 **No sialyltransferase activity was detected for CstIV and CstV using *in vitro* assays.**

119 To determine whether CstIV and CstV are capable of transferring Neu5Ac, *C. coli* crude  
120 protein extracts were tested for sialyltransferase activity using sugar acceptors labelled with  
121 either boron-dipyrromethene (abbreviated as BODIPY or BDP) or fluorescein (FCHASE).  
122 No sialyltransferase activity was detected in the crude protein extracts of *C. coli* 73 and *C.*  
123 *coli* 73  $\Delta$ *cstIV*-SF3. Monospecific  $\alpha$ -2,3-sialyltransferase activity was detected in *C. coli*  
124 76339 WT, *C. coli* 76339  $\Delta$ *cstV*-SF1, and *C. coli* 76339  $\Delta$ *cstV*-SR4 crude protein extracts  
125 using BDP-Lactose (BDP-Lac) and BDP-*N*-acetyllactosamine (BDP-LacNAc) (Suppl. Fig.  
126 S4). Since the genome of *C. coli* 76339 is known to carry the gene encoding the monospecific  
127 CstI  $\alpha$ -2,3-sialyltransferase, the assays were also performed using *C. coli* 76339 $\Delta$ *cstI*-XR3  
128 and *C. coli* 76339 $\Delta$ *cstV*-SR $\Delta$ *cstI*-XR1 protein extracts (data not shown). No measurable  
129 enzymatic activity was detected with any of the tested acceptors in these  $\Delta$ *cstI* strains which  
130 demonstrated that the activity detected in *C. coli* 76339 WT was due to CstI. Furthermore, all  
131 tested recombinant CstIV and CstV showed no activity with any of the tested acceptors,  
132 suggesting that either none of the tested glycans was a suitable acceptor or that another  
133 nonulosonate is the actual donor for these enzymes (data not shown).

## 134 DISCUSSION

135 *C. jejuni* GT-42 were the first glycosyltransferases from this CAZy family to be  
136 enzymatically and structurally characterized; CstII variants can be either monofunctional  
137  $\alpha$ 2,3- sialyltransferases or bifunctional  $\alpha$ 2,3-/ $\alpha$ 2,8-sialyltransferase, while CstI and CstIII are  
138 monofunctional  $\alpha$ 2,3- sialyltransferases (21-24). CstII and CstIII activity has been shown to  
139 be essential for the biosynthesis of ganglioside-like LOS structures, which are linked to GBS  
140 onset (12, 24). Despite the importance of GT-42 enzymes in virulence and pathogenesis (25-  
141 28), the activity of these glycosyltransferases has not been explored in other *Campylobacter*  
142 species. Approximately 29% of *C. coli* genomes have been found to contain a GT-42  
143 encoding gene within the LOS biosynthesis locus (19). While *cstVI* was the most common  
144 LOS associated GT-42 encoding gene in *C. coli*, in 99% of the analysed genomes it was  
145 observed to be present as a pseudo gene (19). Thus, we focused our attention on the role of  
146 *cstIV* and *cstV* in LOS biosynthesis. Until recently, *cstV* had been solely identified in the  
147 genome of *C. coli* 76339 (20). However, in a systematic screen of publicly available *C. coli*  
148 genomes several *cstV* positive strains were identified (19). Since *in vitro* assays have been  
149 previously used to determine the activity of *C. jejuni* GT-42 enzymes (9, 21), a similar  
150 approach was attempted to define CstIV and CstV activity. *C. coli* 76339 crude protein  
151 extracts were tested for sialyltransferase activity, as Neu5Ac had been previously detected in  
152 the strain's LOS (20). Monofunctional sialyltransferase activity was initially observed but  
153 was found to be due to CstI activity. As in *C. jejuni*, *C. coli* 76339 *cstI* is located outside the  
154 LOS biosynthesis locus, and encodes an  $\alpha$ 2,3-sialyltransferase which has no role in LOS  
155 biosynthesis (20, 21). Although transcriptomic analysis showed polycistronic expression of  
156 LOS biosynthesis genes, indicating the active expression of *cstV* (data not shown), no  
157 sialyltransferase activity was detected on the protein extracts of the *cstI* mutant strain.  
158 Inactivation of *neuBI* or *cstV* resulted in identical LOS electrophoretic profiles. Additionally,

159 LC-MS analysis showed that the inactivation of *cstV* resulted in the loss 2 Hex and 1 NeuAc  
160 residues. Nevertheless, recombinant CstV exhibited no detectable activity with any of the  
161 tested acceptors. Thus, it is very likely that *cstV* is associated to *C. coli* 76339 LOS  
162 sialylation. Yet, further studies are required to identified CstV natural acceptor and  
163 corroborate its activity *in vitro*.

164 After *cstVI*, *cstIV* is the most common orthologue; being present in ~38% of the genomes  
165 positive for a LOS associated GT-42. Previously, no evidence of Neu5Ac had been found in  
166 the LOS of strains containing a *cstIV* orthologue (29). This was to be expected as Neu5Ac  
167 biosynthesis genes are rarely present in strains carrying *cstIV* (19). Furthermore, no  
168 sialyltransferase activity was detected neither in *C. coli* 73 protein extracts nor in  
169 recombinant CstIV. Nevertheless, deletion of *cstIV* in *C. coli* 73 resulted in a truncated LOS.  
170 Thus, suggesting a link between *cstIV* and LOS biosynthesis. Sequence alignment of CstIV  
171 with previously characterized GT-42 sialyltransferases revealed numerous amino acid  
172 substitutions at conserved positions (Suppl. Fig. S5) (30). Additionally, superimposition of  
173 CstIV on *C. jejuni* CstII structure identified various substitutions at amino acids involved in  
174 substrate interactions (23, 31-33). Interestingly, most substitutions predicted to impact CstIV  
175 activity were in the amino acids associated with CMP-Neu5Ac, particularly with the Neu5Ac  
176 moiety. Moreover, these substitutions were conserved in multiple CstIV orthologues (23, 32,  
177 33). Altogether, results pointed at the possibility of an alternative sugar donor for CstIV.  
178 Detection of a diNAc-nonulosonate residue in *C. coli* 73 WT LOS and its absence in *C. coli*  
179 73  $\Delta$ *cstIV*-SF3 prompted an investigation on genes potentially linked to the synthesis of this  
180 residue. In *C. coli*, *neuB2* (*ptmC*, *legI*) and *neuB3* (*pseI*) are conserved flagella glycosylation  
181 genes involved in the synthesis of legionaminic and pseudaminic acid derivatives,  
182 respectively (34-40). Deletion of *neuB2* had no impact on *C. coli* 73 LOS electrophoretic  
183 mobility, implying that *neuB2* is not involved in the synthesis of CstIV donor. Despite



184 repetitive attempts, no viable *C. coli* 73  $\Delta$ *neuB3* mutants were obtained. Although *neuB3*  
185 deletion has been successful in *C. coli* VC167, disruption of flagellin glycosylation and the  
186 potential truncation of the LOS might have resulted in a lethal phenotype for *C. coli* 73 (40).  
187 In sum, it is tempting to speculate that the diNAc-nonulosonate residue in *C. coli* 73 WT  
188 corresponds to pseudaminic acid. However, the nature of this residue cannot be inferred from  
189 MS/MS spectra alone since many diNAc-nonulosonate variants have been identified (41).  
190 In conclusion, although we could not determine the complete structures of the LOS outer  
191 cores of *C. coli* 73 and *C. coli* 76339, we have established that they both contain nonulosonic  
192 acid. We have also unequivocally demonstrated that CstIV and CstV are involved in the  
193 synthesis of LOS in their respective stains and, more specifically, they are responsible of the  
194 transfer of a nonulosonic acid residue to the outer core.

## 195 **METHODS**

### 196 **Bacterial strains, plasmids, and growth conditions.**

197 Bacterial strains used in this study are listed in Table 2. Two *C. coli* strains, expressing either  
198 *cstIV* or *cstV*, were selected. Figure 2 shows a schematic representation of the LOS locus and  
199 the position of the insertion of the antibiotic resistance cassette for the mutational studies. *C.*  
200 *coli* 73 possesses LOS locus class II, which contains a copy of *cstIV* and lacks sialic acid  
201 biosynthesis genes *neuABC* or other copies of putative sialyltransferases. However, strain 73  
202 possesses the conserved biosynthesis pathways for both legionaminic (including legionaminic  
203 acid synthetase *neuB2*) and pseudaminic acid (including pseudaminic acid synthetase *neuB3*)  
204 in the flagella glycosylation region (29). *C. coli* 76339 harbours two copies of putative  
205 sialyltransferases: *cstV* as part of LOS locus class IX (Fig. 2) and a *C. jejuni* *cstI* orthologue  
206 located in the capsule region (19, 20). In addition to the conserved legionaminic and  
207 pseudaminic acid biosynthesis pathways, as in *C. coli* 73, *C. coli* 76339 possesses all the

208 genes for the biosynthesis of sialic acid (*neuABIC*) within the LOS locus class IX (Fig. 2). *C.*  
209 *coli* cultivation and DNA isolation were carried out as previously described, unless specified  
210 otherwise (20).

### 211 **Construction of $\Delta$ *cstIV*, $\Delta$ *cstV*, $\Delta$ *cstI*, and $\Delta$ *neuB* mutants.**

212 Chromosomal mutant strains of *C. coli* 76339 (19, 20) and *C. coli* 73 (19, 29) were generated  
213 by homologous recombination with suicide vectors containing genes inactivated by the  
214 insertion of an antibiotic resistance cassette. All recombinant plasmids and primers are shown  
215 in Supplemental material (Suppl. Fig. S6-S11). The genes *cstIV*, *cstV*, *neuB1*, *neuB2*, and  
216 *neuB3* were inactivated by the insertion of an erythromycin resistance cassette (EryC) (42),  
217 while *cstI* was disrupted with a chloramphenicol acetyltransferase cassette (CAT) (43). The  
218 inactivation of *cstV* in *C. coli* 76339 was performed by inserting *eryC* cassette either in the  
219 direction of the gene (SR) or in the opposite direction (SF). Preparation of electrocompetent  
220 cells and transformation was done as previously described (43). Selection of the mutants was  
221 done on nutrient blood agar (NBA) supplemented containing either 10  $\mu\text{g ml}^{-1}$  of  
222 erythromycin or 12.5  $\mu\text{g ml}^{-1}$  of chloramphenicol. Homologous recombination of all mutants  
223 was verified by PCR. Figure 2 shows a summary of the mutations performed in the LOS  
224 locus of *C. coli* strains 76339 and 73.

### 225 **Complementation studies**

226 Complementation of *C. coli* 76339  $\Delta$ *cstV*-SR4 was done in *cis* by integration of *cstV* under  
227 the active promoter of gamma glutamyltranspeptidase (*ggt*). The *ggt* is an accessory gene in  
228 *C. coli* and has no role in LOS biosynthesis. Additionally, the *ggt* locus is located far from the  
229 LOS locus and its deletion does not induce a loss in bacterial viability. The suicide vector  
230 containing an inactivated *ggt* by the insertion of a *cstV* and CAT (pGEM-*ggt*-*cstV*-CAT)  
231 (Suppl. Fig. S12) was used to transform *C. coli* 76339  $\Delta$ *cstV*-SR4 electrocompetent cells as

232 above. Transformants were selected on NBA supplemented with 12.5  $\mu\text{g ml}^{-1}$  of  
233 chloramphenicol. Homologous recombination of mutants was verified by testing for GGT  
234 activity as before (44). Complementation of *cstIV* was not possible due to the absence of a  
235 suitable locus.

### 236 **LOS silver staining.**

237 LOS profiles were assessed by silver staining as described earlier (29). Additionally, LOS  
238 sensitivity to neuraminidase was assessed by treating crude LOS with 2 IU/ml of *Clostridium*  
239 *perfringens* neuraminidase (Sigma-Aldrich) overnight at 37 °C.

### 240 **Mass spectrometry analysis of *C. coli* LOS composition.**

241 Following 1% formaldehyde in PBS (pH 7.4) treatment, *C. coli* cell pellets were washed 3X  
242 in PBS and lyophilized. Then, cells were dehydrated by a sequence of 2 washes in each of  
243 70% ethanol (in PBS), 100% ethanol, and 100% acetone. The dehydrated cells were treated  
244 with proteinase K, RNase A, and DNase I as previously described (45). Digested cells were  
245 then treated with hydrazine to cleave *O*-linked fatty acids (45). The *O*-deacylated LOS  
246 samples were analysed by LC-MS by coupling a Waters Premier Q-TOF with an Agilent  
247 1260 capillary LC system. Mass spectrometry was operated in positive-ion detection mode.  
248 Liquid chromatography separation was done on an Agilent Eclipse XDB C8 column (5  $\mu\text{m}$ ,  
249 50 x 1 mm). The flow rate was 20  $\mu\text{L}/\text{min}$ . Solvent A: aqueous 0.2% formic acid/0.028%  
250 ammonia; solvent B: Isopropanol with 0.2% formic acid/0.028% ammonia. The following  
251 gradient was used: 0-2 min. 10% B, 2-16 min linear gradient to 85% B, 16-25 min. 85% B,  
252 25-30 min., and equilibration at 10% B.

### 253 **Sialyltransferase activity test in *C. coli* protein extracts**

254 To test for sialyltransferase activity, *C. coli* 76339 and 73 were grown for 16 h in nutrient  
255 broth 2 (Oxoid) (100 rpm, microaerobic atmosphere, and 37 °C). Cells were harvested by

256 centrifugation ( $10,000 \times g$  for 15 min at  $4^{\circ}\text{C}$ ) and resuspended in 50 mM HEPES pH 7.5  
257 containing a protease inhibitor cocktail (Sigma). Cells were then lysed by mechanical  
258 disruption and debris was removed by centrifugation ( $10,000 \times g$  for 15 min at  $4^{\circ}\text{C}$ ).  
259 Sialyltransferase activity of protein extracts was tested on boron-dipyrromethene or BODIPY  
260 (BDP) labelled Lac, LacNAc, and 3'Sialyllactose or fluorescein (FCHASE) labelled  $\alpha$ -  
261 GalNAc,  $\beta$ -GalNAc, GM3,  $\alpha$ -Gal,  $\beta$ -GlcNAc,  $\alpha$ -Glc,  $\beta$ -Glc, Hep-Hep-Glc, as acceptors.  
262 Reactions were performed at  $37^{\circ}\text{C}$  in 10  $\mu\text{l}$  volumes containing 50 mM HEPES pH 7.5, 10  
263 mM  $\text{MgCl}_2$ , 1 mM CMP-NeuAc, 0.5 mM labelled acceptor, and 6  $\mu\text{l}$  of extract. To stop  
264 enzymatic reactions an equal volume of 80% acetonitrile was added. Enzymatic activity was  
265 assessed by thin-layer chromatography on silica using a solvent system of ethyl  
266 acetate/methanol/water/acetic acid 4:2:1:0.1.

#### 267 **Expression and activity of recombinant *C. coli* GT-42 enzymes**

268 Gene *cstIV* from *C. coli* 73 and *cstV* from *C. coli* 76339 were amplified and ligated to pCW  
269 and pCW-MalET plasmids (46). Ligation products were then electroporated in *E. coli* 10 $\beta$  for  
270 plasmid amplification. After sequence confirmation, plasmids were electroporated into *E. coli*  
271 AD202 or BL21 for protein expression. Cells containing the protein expression vectors were  
272 grown in 200 mL of 2YT medium supplemented with 150  $\mu\text{g}/\text{mL}$  ampicillin and 0.2% of  
273 glucose at  $25^{\circ}\text{C}$  with 250 rpm shaking. After reaching an  $A_{600\text{nm}}$  of  $\sim 0.6$ , protein over-  
274 expression was induced with 0.5 mM of isopropyl- $\beta$ -D thiogalactopyranoside (IPTG) and  
275 cultures were further incubated for 16 h. Cells were harvested by centrifugation ( $10,000 \times g$   
276 for 15 min at  $4^{\circ}\text{C}$ ) and crude protein extracts were run in 12% SDS-PAGE gels and stained  
277 with Coomassie blue to verify overexpression. In addition, *cstIV* and *cstV* genes were  
278 synthesized with a T7 promoter and a ribosome binding site upstream of the coding sequence  
279 and a T7 terminator downstream from the stop codon (Thermo Scientific). Synthesized  
280 products were inserted into pMA-T vector backbone and proteins were synthesized using the

- 281 cell-free PURExpress *in vitro* Protein Synthesis Kit (New England Biolabs Inc.).
- 282 Recombinant proteins were screened for sialyltransferase activity as described above.

283 **REFERENCES**

- 284 1. **Angata, T., and A. Varki.** 2002. Chemical diversity in the sialic acids and related  $\alpha$ -keto  
285 acids: an evolutionary perspective. *Chem. Rev.* **102**:439-470. doi: 10.1021/cr000407m.  
286 <http://dx.doi.org/10.1021/cr000407m>.
- 287 2. **Gamian, A., C. Jones, T. Lipiński, A. Korzeniowska-Kowal, and N. Ravenscroft.**  
288 2000. Structure of the sialic acid-containing O-specific polysaccharide from *Salmonella*  
289 *enterica* serovar Toucra O48 lipopolysaccharide. *Eur J Biochem.* **267**:3160-3167. doi:  
290 10.1046/j.1432-1327.2000.01335.x.
- 291 3. **Hood, D. W., K. Makepeace, M. E. Deadman, R. F. Rest, P. Thibault, A. Martin, J. C.**  
292 **Richards, and E. R. Moxon.** 1999. Sialic acid in the lipopolysaccharide of *Haemophilus*  
293 *influenzae*: strain distribution, influence on serum resistance and structural characterization.  
294 *Mol Microbiol.* **33**:679-692. doi: 10.1046/j.1365-2958.1999.01509.x.
- 295 4. **Kahler, C. M., L. E. Martin, G. C. Shih, M. M. Rahman, R. W. Carlson, and D. S.**  
296 **Stephens.** 1998. The ( $\alpha$ 2 $\rightarrow$ 8)-linked polysialic acid capsule and lipooligosaccharide structure  
297 both contribute to the ability of serogroup B *Neisseria meningitidis* to resist the bactericidal  
298 activity of normal human serum. *Infect Immun.* **66**:5939-5947.
- 299 5. **Lo, H., C. M. Tang, and R. M. Exley.** 2009. Mechanisms of avoidance of host immunity  
300 by *Neisseria meningitidis* and its effect on vaccine development. *The Lancet Infectious*  
301 *Diseases.* **9**:418-427. doi: [https://doi.org/10.1016/S1473-3099\(09\)70132-X](https://doi.org/10.1016/S1473-3099(09)70132-X).
- 302 6. **Louwen, R., A. Heikema, A. van Belkum, A. Ott, M. Gilbert, W. Ang, H. P. Endtz, M.**  
303 **P. Bergman, and E. E. Nieuwenhuis.** 2008. The sialylated lipooligosaccharide outer core in

- 304 *Campylobacter jejuni* is an important determinant for epithelial cell invasion. Infect Immun.  
305 **76**:4431-4438. doi: 10.1128/IAI.00321-08.
- 306 **7. Lombard, V., H. Golaconda Ramulu, E. Drula, P. M. Coutinho, and B. Henrissat.**  
307 2013. The carbohydrate-active enzymes database (CAZy) in 2013. Nucleic Acids Res.  
308 **42**:D490-D495. doi: 10.1093/nar/gkt1178.  
309 <http://www.ncbi.nlm.nih.gov/pmc/articles/PMC3965031/>.
- 310 **8. Parker, C. T., M. Gilbert, N. Yuki, H. P. Endtz, and R. E. Mandrell.** 2008.  
311 Characterization of lipooligosaccharide-biosynthetic loci of *Campylobacter jejuni* reveals  
312 new lipooligosaccharide classes: evidence of mosaic organizations , J. Bacteriol. **190**:5681-  
313 5689.
- 314 **9. Gilbert, M., M. Karwaski, S. Bernatchez, N. M. Young, E. Taboada, J. Michniewicz,**  
315 **A. Cunningham, and W. W. Wakarchuk.** 2002. The genetic bases for the variation in the  
316 lipo-oligosaccharide of the mucosal pathogen, *Campylobacter jejuni*. J. Biol. Chem. **277**:327-  
317 337. doi: 10.1074/jbc.M108452200.
- 318 **10. Richards, V. P., T. Lefébure, P. D. Pavinski Bitar, and M. J. Stanhope.** 2013.  
319 Comparative characterization of the virulence gene clusters (lipooligosaccharide [LOS] and  
320 capsular polysaccharide [CPS]) for *Campylobacter coli*, *Campylobacter jejuni* subsp. *jejuni*  
321 and related *Campylobacter* species. Infect Genet Evol. **14**:200-213. doi:  
322 10.1016/j.meegid.2012.12.010.
- 323 **11. Godschalk, P. C. R., M. L. Kuijff, J. Li, F. St. Michael, C. W. Ang, B. C. Jacobs, M.**  
324 **Karwaski, D. Brochu, A. Moterassed, H. P. Endtz, A. van Belkum, and M. Gilbert.**  
325 2007. Structural characterization of *Campylobacter jejuni* lipooligosaccharide outer cores

- 326 associated with Guillain-Barré and Miller Fisher syndromes. *Infect. Immun.* **75**:1245-1254.  
327 doi: 10.1128/IAI.00872-06.
- 328 12. **Godschalk, P., A. Heikema, and M. e. a. Gilbert.** 2004. The crucial role  
329 of *Campylobacter jejuni* genes in anti-ganglioside antibody induction in Guillain-Barré  
330 syndrome. *J. Clin. Invest.* **114**:1659-1665.
- 331 13. **Houliston, R. S., E. Vinogradov, M. Dzieciatkowska, J. Li, F. St. Michael, M.**  
332 **Karwaski, D. Brochu, H. C. Jarrell, C. T. Parker, N. Yuki, R. E. Mandrell, and M.**  
333 **Gilbert.** 2011. Lipooligosaccharide of *Campylobacter jejuni*: similarity with multiple types  
334 of mammalian glycans beyond gangliosides. *J Biol Chem.* **286**:12361-12370. doi:  
335 10.1074/jbc.M110.181750.
- 336 14. **Yuki, N.** 2005. Carbohydrate mimicry: a new paradigm of autoimmune diseases. *Curr.*  
337 *Opin. Immunol.* **17**:577-582. doi: <http://dx.doi.org/10.1016/j.coi.2005.09.004>.
- 338 15. **Wulffen, H. v., C. Hartard, and E. Scharein.** 1994. Seroreactivity to *Campylobacter*  
339 *jejuni* and gangliosides in patients with Guillain-Barré syndrome. *J. Infect. Dis.* **170**:828-833.
- 340 16. **Funakoshi, K., M. Koga, M. Takahashi, K. Hirata, and N. Yuki.** 2006.  
341 *Campylobacter coli* enteritis and Guillain-Barré syndrome: No evidence of molecular  
342 mimicry and serological relationship. *Journal of the Neurological Sciences.* **246**:163-168.
- 343 17. **Bersudskya, M., P. Rosenbergb, B. Rudenskyc, and I. Wirguin.** 2000.  
344 Lipopolysaccharides of a *Campylobacter coli* isolate from a patient with Guillain-Barré  
345 syndrome display ganglioside mimicry. *Neuromuscular Disorders.* **10**:182-186.
- 346 18. **van Belkum, A., B. Jacobs, E. van Beek, R. Louwen, W. van Rijs, L. Debruyne, M.**  
347 **Gilbert, J. Li, A. Jansz, F. MÃ©graud, and H. Endtz.** 2009. Can *Campylobacter coli*



- 348 induce Guillain-Barré syndrome? *European Journal of Clinical Microbiology & Infectious*  
349 *Diseases*. **28**:557-560. doi: 10.1007/s10096-008-0661-9. <http://dx.doi.org/10.1007/s10096->  
350 008-0661-9.
- 351 19. **Culebro, A., M. P. Machado, J. A. Carriço, and M. Rossi.** 2017. Origin, evolution, and  
352 distribution of the molecular machinery for biosynthesis of sialylated lipooligosaccharide  
353 structures in *Campylobacter coli*. *bioRxiv*. . doi: 10.1101/225771.
- 354 20. **Skarp-de Haan, C., A. Culebro, T. Schott, J. Revez, E. Schweda, M. Hanninen, and**  
355 **M. Rossi.** 2014. Comparative genomics of unintrogressed *Campylobacter coli* clades 2 and 3.  
356 *BMC Genomics*. **15**:129.
- 357 21. **Gilbert, M., J. Brisson, M. Karwaski, J. Michniewicz, A. Cunningham, Y. Wu, N. M.**  
358 **Young, and W. W. Wakarchuk.** 2000. Biosynthesis of ganglioside mimics in  
359 *Campylobacter jejuni* OH4384: identification of the glycosyltransferase genes, enzymatic  
360 synthesis of model compounds, and characterization of nanomole amounts by 600-MHz <sup>1</sup>H  
361 and <sup>13</sup>C NMR analysis . *J Biol Chem*. **275**:3896-3906. doi: 10.1074/jbc.275.6.3896.
- 362 22. **Chiu, C. P. C., L. L. Lairson, M. Gilbert, W. W. Wakarchuk, S. G. Withers, and N.**  
363 **C. J. Strynadka.** 2007. Structural analysis of the α-2,3-sialyltransferase Cst-I from  
364 *Campylobacter jejuni* in apo and substrate-analogue bound forms. *Biochemistry*. **46**:7196-  
365 7204. doi: 10.1021/bi602543d. <http://dx.doi.org/10.1021/bi602543d>.
- 366 23. **Chiu, C. P. C., A. G. Watts, L. L. Lairson, M. Gilbert, D. Lim, W. W. Wakarchuk,**  
367 **S. G. Withers, and N. C. J. Strynadka.** 2004. Structural analysis of the sialyltransferase  
368 CstII from *Campylobacter jejuni* in complex with a substrate analog. *Nat Struct Mol Biol*.  
369 **11**:163-170. <http://dx.doi.org/10.1038/nsmb720>.

- 370 24. **Guerry, P., C. P. Ewing, T. E. Hickey, M. M. Prendergast, and A. P. Moran.** 2000.  
371 Sialylation of lipooligosaccharide cores affects immunogenicity and serum resistance of  
372 *Campylobacter jejuni*. *Infection and Immunity*. **68**:6656-6662.
- 373 25. **Mortensen, N. P., M. L. Kuijf, C. W. Ang, P. Schiellerup, K. A. Krogh, B. C.**  
374 **Jacobs, A. van Belkum, H. P. Endtz, and M. P. Bergman.** 2009. Sialylation of  
375 *Campylobacter jejuni* lipo-oligosaccharides is associated with severe gastro-enteritis and  
376 reactive arthritis. *Microb. Infect.* **11**:988-994. doi:  
377 <http://dx.doi.org/10.1016/j.micinf.2009.07.004>.
- 378 26. **Kuijf, M. L., J. N. Samsom, W. van Rijs, M. Bax, R. Huizinga, A. P. Heikema, P. A.**  
379 **van Doorn, A. van Belkum, Y. van Kooyk, P. C. Burgers, T. M. Luiders, H. P. Endtz, E.**  
380 **E. S. Nieuwenhuis, and B. C. Jacobs.** 2010. TLR4-mediated sensing of *Campylobacter*  
381 *jejuni* by dendritic cells is determined by sialylation. *J. Immunol.* **185**:748-755. doi:  
382 [10.4049/jimmunol.0903014](https://doi.org/10.4049/jimmunol.0903014).
- 383 27. **Huizinga, R., W. van Rijs, J. J. Bajramovic, M. L. Kuijf, J. D. Laman, J. N.**  
384 **Samsom, and B. C. Jacobs.** 2013. Sialylation of *Campylobacter jejuni* endotoxin promotes  
385 dendritic cell-mediated B cell responses through CD14-dependent production of IFN- $\beta$  and  
386 TNF- $\alpha$ . *J. Immunol.* **191**:5636-5645. doi: [10.4049/jimmunol.1301536](https://doi.org/10.4049/jimmunol.1301536).
- 387 28. **Huizinga, R., A. S. Easton, A. M. Donachie, J. Guthrie, W. van Rijs, A. Heikema, L.**  
388 **Boon, J. N. Samsom, B. C. Jacobs, H. J. Willison, and C. S. Goodyear.** 2012. Sialylation  
389 of *Campylobacter jejuni* lipo-oligosaccharides: Impact on phagocytosis and cytokine  
390 production in mice. *PLoS ONE*. **7**:e34416.  
391 <http://dx.doi.org/10.1371/journal.pone.0034416>.

- 392 29. **Culebro, A., J. Revez, B. Pascoe, Y. Friedmann, M. D. Hitchings, J. Stupak, S. K.**  
393 **Sheppard, J. Li, and M. Rossi.** 2016. Large Sequence Diversity within the Biosynthesis  
394 Locus and Common Biochemical Features of *Campylobacter coli* Lipooligosaccharides.  
395 *Journal of Bacteriology*. **198**:2829-2840. doi: 10.1128/JB.00347-16.
- 396 30. **Schur, M. J., E. Lameignere, N. C. Strynadka, and W. W. Wakarchuk.** 2012.  
397 Characterization of  $\alpha$ 2,3- and  $\alpha$ 2,6-sialyltransferases from *Helicobacter acinonychis*.  
398 *Glycobiology*. **22**:997-1006. doi: 10.1093/glycob/cws071.
- 399 31. **Chan, P. H. W., L. L. Lairson, H. J. Lee, W. W. Wakarchuk, N. C. J. Strynadka, S.**  
400 **G. Withers, and L. P. McIntosh.** 2009. NMR spectroscopic characterization of the  
401 sialyltransferase CstII from *Campylobacter jejuni*: histidine 188 is the general base.  
402 *Biochemistry (N. Y. )*. **48**:11220-11230. doi: 10.1021/bi901606n.  
403 <http://dx.doi.org/10.1021/bi901606n>.
- 404 32. **Lee, H. J., L. L. Lairson, J. R. Rich, E. Lameignere, W. W. Wakarchuk, S. G.**  
405 **Withers, and N. C. J. Strynadka.** 2011. Structural and kinetic analysis of substrate binding  
406 to the sialyltransferase Cst-II from *Campylobacter jejuni*. *J Biol Chem*. **286**:35922-35932.  
407 doi: 10.1074/jbc.M111.261172.
- 408 33. **Aharoni, A., K. Thieme, C. P. C. Chiu, S. Buchini, L. L. Lairson, H. Chen, N. C. J.**  
409 **Strynadka, W. W. Wakarchuk, and S. G. Withers.** 2006. High-throughput screening  
410 methodology for the directed evolution of glycosyltransferases. *Nat Meth*. **3**:609-614.  
411 <http://dx.doi.org/10.1038/nmeth899>.
- 412 34. **Schoenhofen, I. C., D. J. McNally, J. Brisson, and S. M. Logan.** 2006. Elucidation of  
413 the CMP-pseudaminic acid pathway in *Helicobacter pylori*: synthesis from UDP-N-

- 414 acetylglucosamine by a single enzymatic reaction. *Glycobiology*. **16**:8C-14C. doi:  
415 10.1093/glycob/cw1010.
- 416 **35. Schoenhofen, I. C., E. Vinogradov, D. M. Whitfield, J. Brisson, and S. M. Logan.**  
417 2009. The CMP-legionaminic acid pathway in *Campylobacter*: Biosynthesis involving novel  
418 GDP-linked precursors. *Glycobiology*. **19**:715-725. doi: 10.1093/glycob/cwp039.
- 419 **36. Sundaram, A., L. Pitts, K. Muhammad, J. Wu, M. Betenbaugh, R. Woodard, and**  
420 **W. Vann.** 2004. Characterization of *N*-acetylneuraminic acid synthase isoenzyme 1 from  
421 *Campylobacter jejuni*. *Biochem. J.* **383**:83.  
422 <http://www.biochemj.org/content/383/1/83.abstract>.
- 423 **37. Linton, D., A. V. Karlyshev, P. G. Hitchen, H. R. Morris, A. Dell, N. A. Gregson, and**  
424 **B. W. Wren.** 2000. Multiple *N*-acetyl neuraminic acid synthetase (*neuB*) genes in  
425 *Campylobacter jejuni*: identification and characterization of the gene involved in sialylation  
426 of lipo-oligosaccharide. *Mol. Microbiol.* **35**:1120-1134. doi: 10.1046/j.1365-  
427 2958.2000.01780.x. <http://dx.doi.org/10.1046/j.1365-2958.2000.01780.x>.
- 428 **38. Lewis, A. L., N. Desa, E. E. Hansen, Y. A. Knirel, J. I. Gordon, P. Gagneux, V. Nizet,**  
429 **and A. Varki.** 2009. Innovations in host and microbial sialic acid biosynthesis revealed by  
430 phylogenomic prediction of nonulosonic acid structure. *Proceedings of the National*  
431 *Academy of Sciences.* **106**:13552-13557. doi: 10.1073/pnas.0902431106.
- 432 **39. McNally, D. J., A. J. Aubry, J. P. Hui, N. H. Khieu, D. Whitfield, C. P. Ewing, P.**  
433 **Guerry, J. R. Brisson, S. M. Logan, and E. C. Soo.** 2007. Targeted metabolomics analysis  
434 of *Campylobacter coli* VC167 reveals legionaminic acid derivatives as novel flagellar  
435 glycans. *J Biol Chem.* **282**:14463-14475. doi: M611027200 [pii].

- 436 40. **Logan, S. M., J. F. Kelly, P. Thibault, C. P. Ewing, and P. Guerry.** 2002. Structural  
437 heterogeneity of carbohydrate modifications affects serospecificity of *Campylobacter*  
438 flagellins. *Mol Microbiol.* **46**:587-597.
- 439 41. **Varki, A., R. L. Schnaar, and R. Schauer.** 2017. Sialic Acids and Other Nonulosonic  
440 Acids, p. 179-195. *In* 3rd, A. Varki, R. D. Cummings, J. D. Esko, P. Stanley, G. W. Hart, M.  
441 Aebi, A. G. Darvill, T. Kinoshita, N. H. Packer, J. H. Prestegard, R. L. Schnaar, and P. H.  
442 Seeberger (eds.), *Essentials of Glycobiology.* by The Consortium of Glycobiology Editors,  
443 La Jolla, California, Cold Spring Harbor (NY).
- 444 42. **Thomas, M. T., M. Shepherd, R. K. Poole, A. H. M. van Vliet, D. J. Kelly, and B. M.**  
445 **Pearson.** 2011. Two respiratory enzyme systems in *Campylobacter jejuni* NCTC 11168  
446 contribute to growth on L-lactate. *Environ. Microbiol.* **13**:48-61. doi: 10.1111/j.1462-  
447 2920.2010.02307.x.
- 448 43. **Olkkola, S., A. Culebro, P. Juntunen, M. Hänninen, and M. Rossi.** 2016. Functional  
449 genomics in *Campylobacter coli* identified a novel streptomycin resistance gene located in a  
450 hypervariable genomic region. *Microbiology.* **162**:1157-1166. doi: 10.1099/mic.0.000304.
- 451 44. **de Haan, C. P. A., A. Llarena, J. Revez, and M. Hänninen.** 2012. Association of  
452 *Campylobacter jejuni* metabolic traits with multilocus sequence types. *Applied and*  
453 *Environmental Microbiology.* **78**:5550-5554. doi: 10.1128/AEM.01023-12.
- 454 45. **Li, J., M. Koga, D. Brochu, N. Yuki, K. Chan, and M. Gilbert.** 2005. Electrophoresis-  
455 assisted open-tubular liquid chromatography/mass spectrometry for the analysis of  
456 lipooligosaccharide expressed by *Campylobacter jejuni*. *Electrophoresis.* **26**:3360-3368.  
457 <http://search.proquest.com/docview/20684538/abstract/embedded/A0UHBWPTOXMVG622>  
458 ?source=fedsrch.

459 46. **Bernatchez, S., M. Gilbert, M. Blanchard, M. Karwaski, J. Li, S. DeFrees, and W.**  
460 **W. Wakarchuk.** 2007. Variants of the  $\beta$ 1,3-galactosyltransferase CgtB from the bacterium  
461 *Campylobacter jejuni* have distinct acceptor specificities. *Glycobiology*. **17**:1333-1343.  
462 <http://dx.doi.org/10.1093/glycob/cwm090>.

463

464

465

466 **ACKNOWLEDGEMENTS**

467 This research project was supported by the University of Helsinki research grant n.  
468 313/51/2013, and the Walter Ehrström Foundation travel grant. A. K was supported by the  
469 Microbiology and Biotechnology graduate program from the University of Helsinki. The  
470 authors wish to thank Marja-Liisa Hänninen for providing the strains and Arnoud HM van  
471 Vliet for providing the erythromycin resistance cassette. We thank Denis Brochu for help  
472 with the preparation of the samples for mass spectrometry analysis and data presentation.

473 **CONTRIBUTIONS**

474 A.K and M.R designed and coordinated the study. A.K generated all *C. coli* mutants. A.K,  
475 M.G, and W.W participated in enzymatic assays. J.S and J.L performed LC-MS analysis. J.S,  
476 J.L, and M.G interpreted LC-MS data. A.K drafted the manuscript. All authors have  
477 contributed to data interpretation, have critically reviewed the manuscript, and approved the  
478 final version as submitted.

479 **ADDITIONAL INFORMATION**

480 The authors declare that they have no competing interests.

481 **DISCLAIMER**

482 M. R is currently employed with the European Food Safety Authority (EFSA) in its BIOCONTAM  
483 Unit that provides scientific and administrative support to EFSA's scientific activities in the area of  
484 Microbial Risk Assessment. The positions and opinions presented in this article are those of the  
485 authors alone and are not intended to represent the views or scientific works of EFSA.

486

487

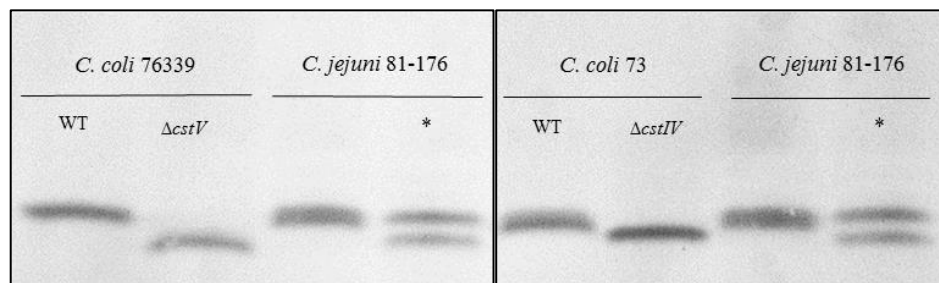

488

489

490

491

492

493

494

**Figure 1.** Electrophoresis mobility comparison of (A) *C. coli* 76339 LOS of WT and mutant strains and (B) *C. coli* 73 LOS of WT and mutant strains. *C. jejuni* 81-176 was used as a reference. Lanes marked with an asterisk show *C. jejuni* 81-176 LOS samples treated with neuraminidase to indicate the expected mobility when a Neu5Ac residue is removed.



A *C. coli* 76339 LOS locus class IX

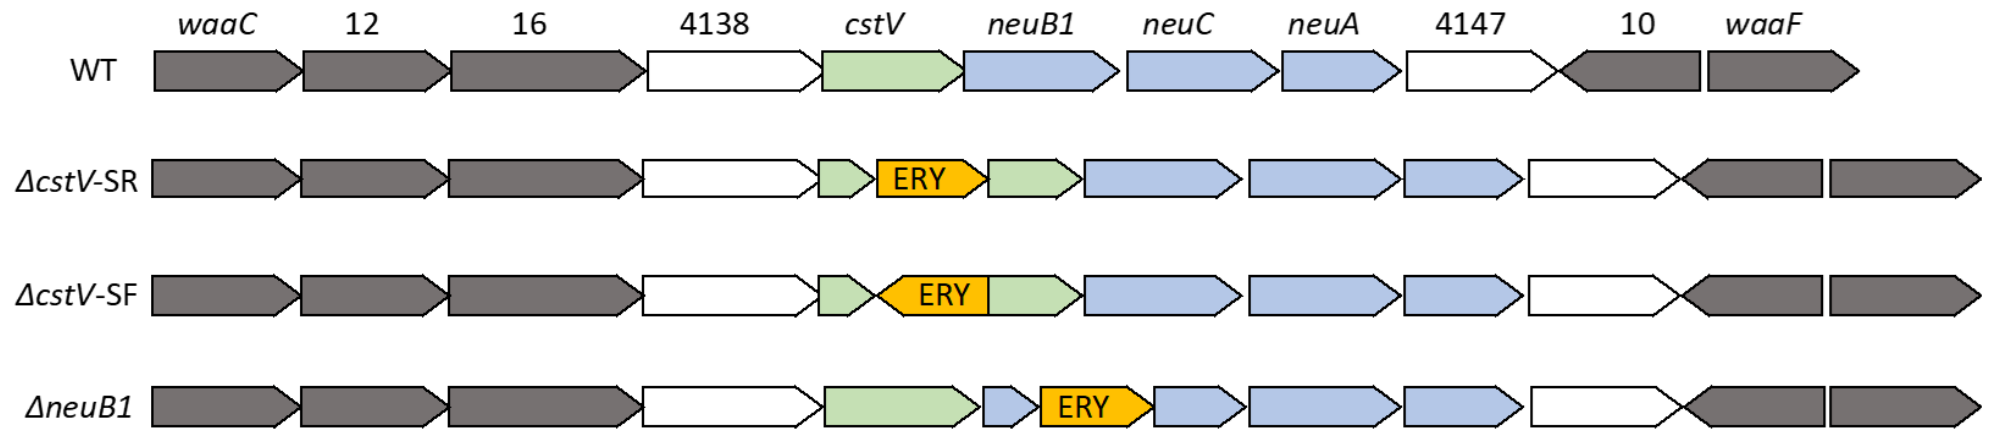

B *C. coli* 73 LOS locus class II

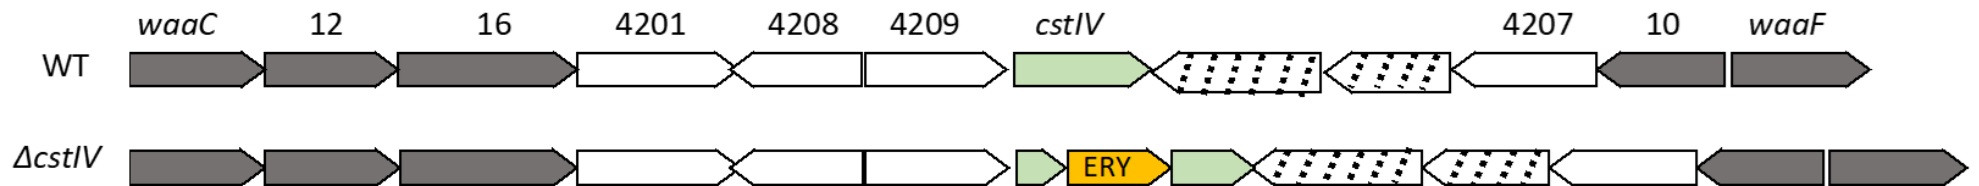

**Figure 2.** Schematic representation of (A) *C. coli* 76339 LOS locus class IX and (B) *C. coli* 73 LOS locus class II wild types and corresponding mutants. Grey arrows are conserved genes across LOS locus classes as described in (10). Light green arrows represent the GT-42 encoding genes. Light blue arrows represent the genes involved in CMP-Neu5Ac biosynthesis. White arrows show accessory genes with unknown functions. Striped arrows represent pseudogenes in LOS locus class II. Orange arrow indicated with ERY corresponds to the antibiotic resistance cassette used for producing the mutants. Numbers correspond to the gene clusters as described in (19).

502 **Table 1.** LC-MS in positive mode data and proposed compositions for *O*-deacylated LOS of *C. coli* 76339 and corresponding *cstI* and *cstV* knock-out mutants.  
503

| Strain               | Observed ions<br>( <i>m/z</i> ) |                                       |                      |                                      | Molecular mass<br>(Da) |                         | Proposed compositions                                                                                                    |                               |                          |
|----------------------|---------------------------------|---------------------------------------|----------------------|--------------------------------------|------------------------|-------------------------|--------------------------------------------------------------------------------------------------------------------------|-------------------------------|--------------------------|
|                      | [M+3H] <sup>3+</sup>            | [M+2H+NH <sub>4</sub> ] <sup>3+</sup> | [M+2H] <sup>2+</sup> | [M+H+NH <sub>4</sub> ] <sup>2+</sup> | Observed               | Calculated <sup>i</sup> | Core oligosaccharide                                                                                                     | Phosphorylation<br>in lipid A | Acylation in<br>lipid A  |
| WT                   | 1063.43                         | 1069.11                               |                      |                                      | 3187.30                | 3187.35                 | Kdo <sub>2</sub> •Hep <sub>2</sub> •Hex <sub>4</sub> •HexNAc <sub>1</sub> •NeuAc <sub>1</sub>                            | <i>PPEtn</i>                  | 3 <i>N</i> -(C14:0 3-OH) |
|                      | 1104.43                         | 1110.11                               |                      |                                      | 3310.30                | 3310.36                 | Kdo <sub>2</sub> •Hep <sub>2</sub> •Hex <sub>4</sub> •HexNAc <sub>1</sub> •NeuAc <sub>1</sub> • <i>PEtn</i> <sub>1</sub> | <i>PPEtn</i>                  | 3 <i>N</i> -(C14:0 3-OH) |
|                      | 1138.48                         | 1144.17                               |                      |                                      | 3412.46                | 3412.56                 | Kdo <sub>2</sub> •Hep <sub>2</sub> •Hex <sub>4</sub> •HexNAc <sub>1</sub> •NeuAc <sub>1</sub>                            | <i>PPEtn</i>                  | 4 <i>N</i> -(C14:0 3-OH) |
|                      | 1179.51                         | 1185.17                               |                      |                                      | 3535.51                | 3535.57                 | Kdo <sub>2</sub> •Hep <sub>2</sub> •Hex <sub>4</sub> •HexNAc <sub>1</sub> •NeuAc <sub>1</sub> • <i>PEtn</i> <sub>1</sub> | <i>PPEtn</i>                  | 4 <i>N</i> -(C14:0 3-OH) |
| $\Delta$ <i>cstI</i> | 1063.44                         | 1069.11                               |                      |                                      | 3187.31                | 3187.35                 | Kdo <sub>2</sub> •Hep <sub>2</sub> •Hex <sub>4</sub> •HexNAc <sub>1</sub> •NeuAc <sub>1</sub>                            | <i>PPEtn</i>                  | 3 <i>N</i> -(C14:0 3-OH) |
|                      | 1104.44                         | 1110.12                               |                      |                                      | 3310.33                | 3310.36                 | Kdo <sub>2</sub> •Hep <sub>2</sub> •Hex <sub>4</sub> •HexNAc <sub>1</sub> •NeuAc <sub>1</sub> • <i>PEtn</i> <sub>1</sub> | <i>PPEtn</i>                  | 3 <i>N</i> -(C14:0 3-OH) |
|                      | 1138.51                         | 1144.18                               |                      |                                      | 3412.52                | 3412.56                 | Kdo <sub>2</sub> •Hep <sub>2</sub> •Hex <sub>4</sub> •HexNAc <sub>1</sub> •NeuAc <sub>1</sub>                            | <i>PPEtn</i>                  | 4 <i>N</i> -(C14:0 3-OH) |
|                      | 1179.51                         | 1185.20                               |                      |                                      | 3535.55                | 3535.57                 | Kdo <sub>2</sub> •Hep <sub>2</sub> •Hex <sub>4</sub> •HexNAc <sub>1</sub> •NeuAc <sub>1</sub> • <i>PEtn</i> <sub>1</sub> | <i>PPEtn</i>                  | 4 <i>N</i> -(C14:0 3-OH) |
| $\Delta$ <i>cstV</i> |                                 |                                       | 1225.56              | 1234.09                              | 2449.14                | 2449.14                 | Kdo <sub>2</sub> •Hep <sub>2</sub> •Hex <sub>2</sub> •HexNAc <sub>1</sub>                                                | <i>P</i>                      | 3 <i>N</i> -(C14:0 3-OH) |
|                      |                                 |                                       | 1287.08              | 1295.56                              | 2572.13                | 2572.15                 | Kdo <sub>2</sub> •Hep <sub>2</sub> •Hex <sub>2</sub> •HexNAc <sub>1</sub>                                                | <i>PPEtn</i>                  | 3 <i>N</i> -(C14:0 3-OH) |
|                      |                                 |                                       | 1348.58              |                                      | 2695.14                | 2695.16                 | Kdo <sub>2</sub> •Hep <sub>2</sub> •Hex <sub>2</sub> •HexNAc <sub>1</sub> • <i>PEtn</i> <sub>1</sub>                     | <i>PPEtn</i>                  | 3 <i>N</i> -(C14:0 3-OH) |

504

505 <sup>i</sup> Isotope-monoisotopic mass units were used for calculation of molecular mass values based on proposed compositions as follows: HexN, 161.0688; HexN3N, 160.0848;  
506 C14:0 3-OH, 226.1933; *PEtn*, 123.0085; *P*, 79.9663; Kdo, 220.0583; Hep, 192.0634; Hex, 162.0528; HexNAc, 203.0794; NeuAc, 291.0954; H<sub>2</sub>O, 18.0106.  
507

508

509

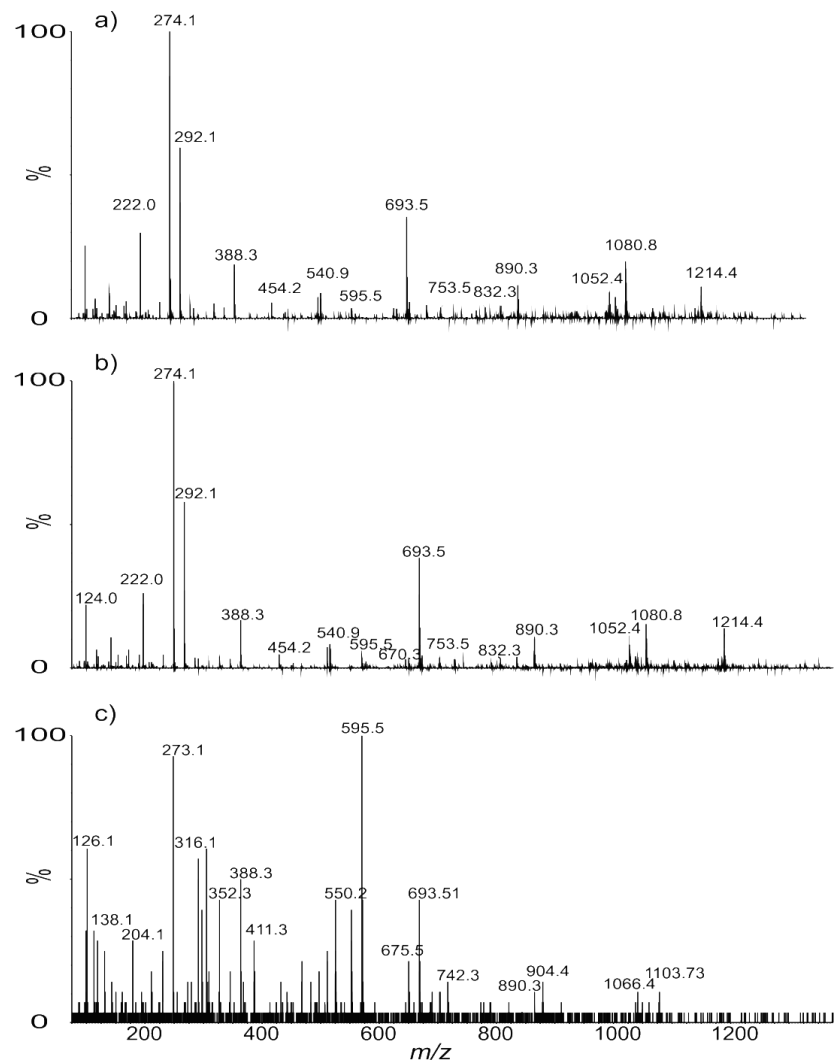

**Figure 3.** MS/MS spectra for the precursor ions of *O*-deacylated LOS from (a) *C. coli* 76339 WT,  $m/z$  1064.0; (b) *C. coli* 76339  $\Delta cstI$ ,  $m/z$  1064.0; and (c) *C. coli* 76339  $\Delta cstV$ ,  $m/z$  1295.4.

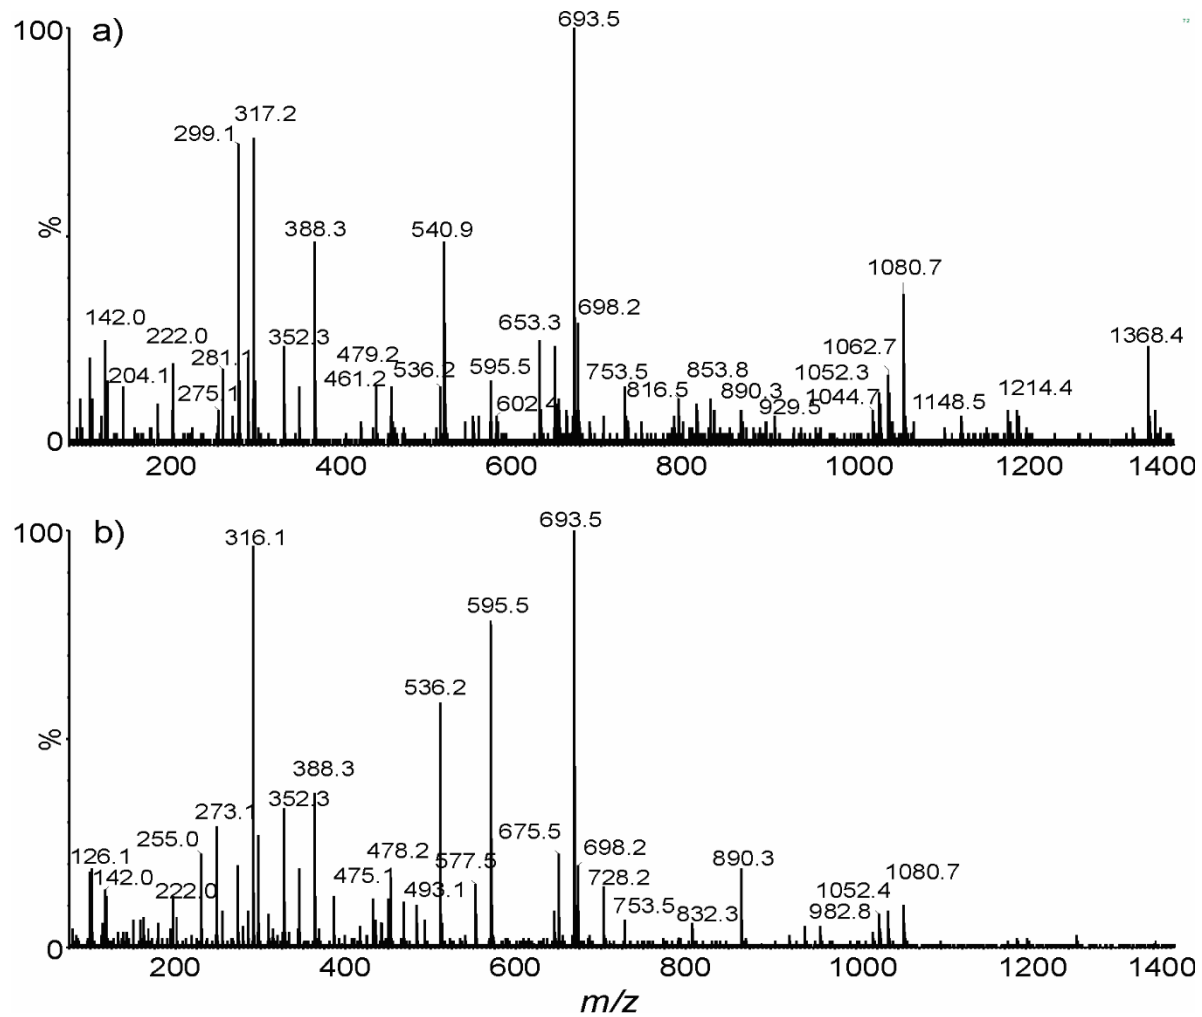

**Figure 4.** MS/MS spectra for the precursor ions of *O*-deacylated LOS from (a) *C. coli* strain 73 WT, *m/z* 1072.4; (b) *C. coli* 73  $\Delta$ *cstIV*-SF3, *m/z* 1566.0.

518 **Table 2.** Bacterial strains

| <b>Strain or plasmid</b>                                                    | <b>Genotype and/or phenotype</b>                                                   | <b>Reference or source</b> |
|-----------------------------------------------------------------------------|------------------------------------------------------------------------------------|----------------------------|
| <i>C. coli</i> 76339                                                        | <i>cstI, cstV, neuB</i>                                                            | (20)                       |
| <i>C. coli</i> 76339 $\Delta$ <i>cstV</i> -SF1                              | <i>cstI, <math>\Delta</math>cstV: Ery, neuB</i>                                    | This study                 |
| <i>C. coli</i> 76339 $\Delta$ <i>cstV</i> -SR4                              | <i>cstI, <math>\Delta</math>cstV: Ery, neuB</i>                                    | This study                 |
| <i>C. coli</i> 76339 $\Delta$ <i>neuB</i> -SR1                              | <i>cstI, <math>\Delta</math>neuB: Ery, cstV</i>                                    | This study                 |
| <i>C. coli</i> 76339 $\Delta$ <i>cstI</i> -XR3                              | $\Delta$ <i>cstI</i> : CAT, <i>cstV, neuB</i>                                      | This study                 |
| <i>C. coli</i> 76339 $\Delta$ <i>cstV</i> -SR4 $\Delta$ <i>cstI</i> -XR1    | $\Delta$ <i>cstI</i> : CAT, $\Delta$ <i>cstV</i> : Ery, <i>neuB</i>                | This study                 |
| <i>C. coli</i> 76339 $\Delta$ <i>neuB</i> -SR2                              | <i>cstI, <math>\Delta</math>neuB: Ery, cstV</i>                                    | This study                 |
| <i>C. coli</i> 76339 $\Delta$ <i>cstV</i> -SR4 $\Delta$ ggt: <i>cstV</i> -2 | <i>cstI, <math>\Delta</math>cstV: Ery, neuB,</i><br>$\Delta$ ggt: <i>cstV</i> :CAT | This study                 |
| <i>C. coli</i> 73                                                           | <i>cstIV</i>                                                                       | (29)                       |
| <i>C. coli</i> 73 $\Delta$ <i>cstIV</i> -SF3                                | $\Delta$ <i>cstIV</i> :Ery                                                         | This study                 |
| <i>C. coli</i> 73 $\Delta$ <i>neuB2</i>                                     | $\Delta$ <i>neuB2</i> :Ery                                                         | This study                 |
| <i>C. jejuni</i> 81-176                                                     |                                                                                    |                            |
| <i>E. coli</i> AD202                                                        |                                                                                    | (46)                       |

519

520

521
