# Supplementary material for: Genetics behind the biosynthesis of nonulosonic acid containing lipooligosaccharides in Campylobacter coli
Source: bioRxiv or medRxiv preprint supplement (doi:10.1101/254235), 2018-12-07
Supplement: Supplementary file [file 254235-1.pdf]

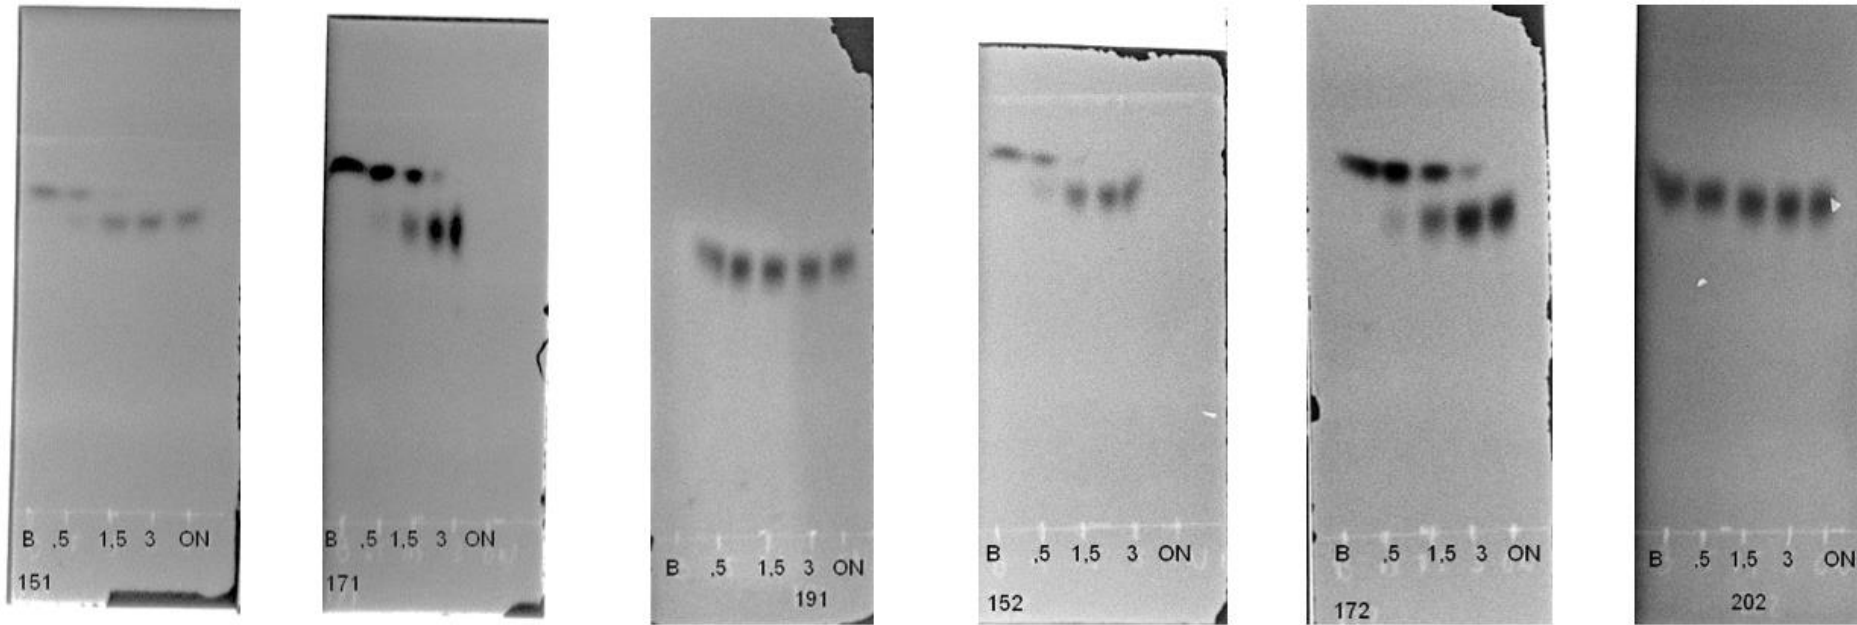

| Sample code | Strain                                    | BDP-acceptor |
|-------------|-------------------------------------------|--------------|
| 151         | <i>C. coli</i> 76339                      | Lac          |
| 171         | <i>C. coli</i> 76339                      | LacNAc       |
| 191         | <i>C. coli</i> 76339                      | SiaLac       |
| 152         | <i>C. coli</i> 76339 $\Delta$ <i>cstV</i> | Lac          |
| 172         | <i>C. coli</i> 76339 $\Delta$ <i>cstV</i> | LacNAc       |
| 192         | <i>C. coli</i> 76339 $\Delta$ <i>cstV</i> | SiaLac       |

**Supplemental Figure 1.** Example of enzymatic test. Sialyltransferase activity of protein extracts was tested on BODIPY labelled Lac, LacNAc, and 3'Siayllactose or FCHASE labelled  $\alpha$ -GalNAc,  $\beta$ -GalNAc, GM3,  $\alpha$ -Gal,  $\beta$ -GlcNAc,  $\alpha$ -Glc,  $\beta$ -Glc, Hep, as donors. Reactions were performed at 37 °C in 10  $\mu$ l volumes containing 50 mM HEPES pH 7.5, 10 mM MgCl<sub>2</sub>, 1 mM CMP-NeuAc, 0.5 mM labelled acceptor, and 6  $\mu$ l of extract. Enzymatic activity was assessed by thin-layer chromatography on silica using a solvent system of ethyl acetate/methanol/water/acetic acid 4:2:1:0.1.

Samples were incubated for 0.5, 1, 1.5, and 3 hours, and overnight (ON)

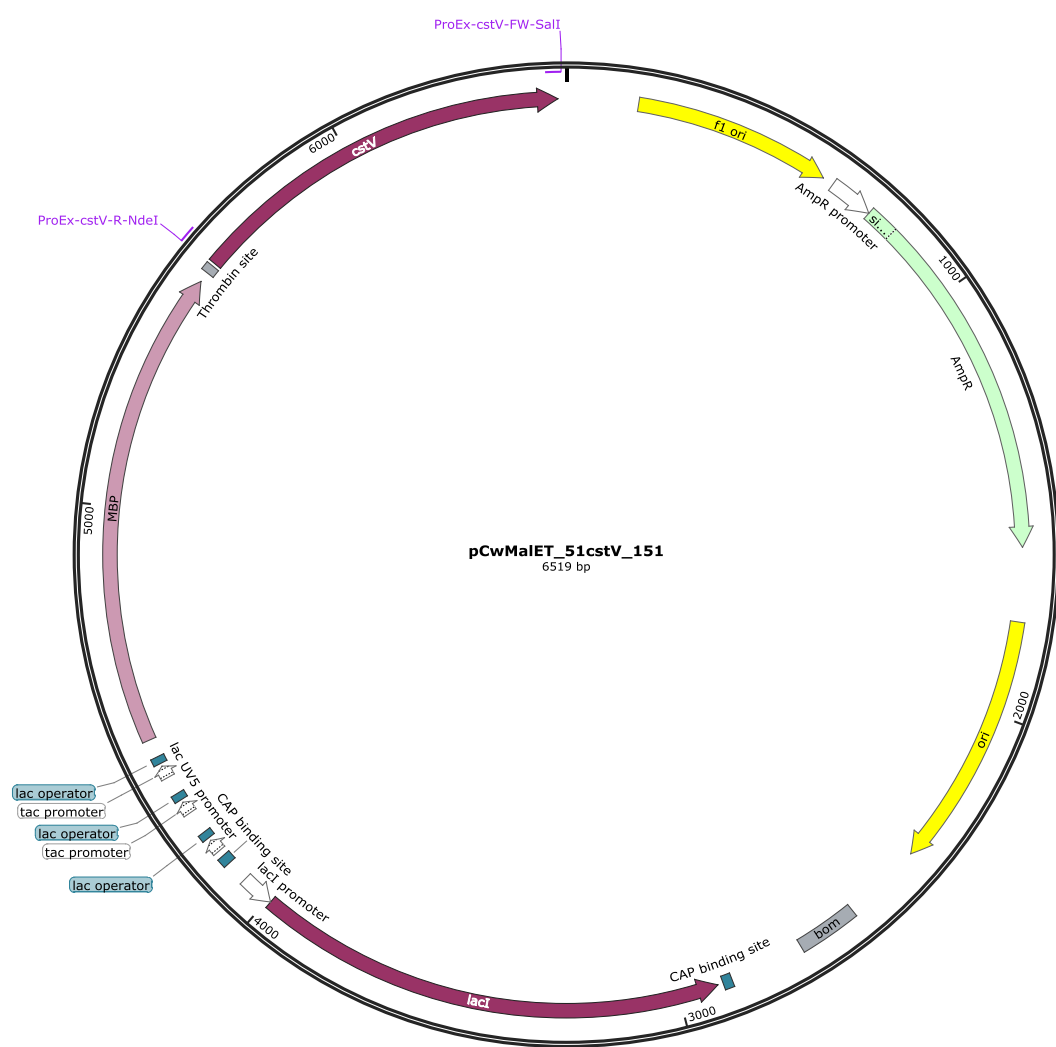

| Primer name                | Sequence                             |
|----------------------------|--------------------------------------|
| <b>ProEx-cstIV-F-NdeI</b>  | GGGGGGGGCCATATGAATAAAAATTTAAATTTTACA |
| <b>ProEx-cstIV-RW-SalI</b> | ACCGTCGACCTATCTTGTATATCTTGTTTTTGA    |
| <b>ProEx-cstV-R-NdeI</b>   | CCATATGATAGAAAACAATGCAGTTGTTGTTGCA   |
| <b>ProEx-cstV-FW-SalI</b>  | ACCGTCGACTTATTTTGCCTTTTTTATATTTTAAAA |

**Supplemental Figure 2.** Graphic representation of CstV protein expression construct. Gene *cstIV* from *C. coli* 73 and *cstV* from *C. coli* 76339 inserted into pCw and pCw-MalET plasmids. *E. coli* AD202 or *E. coli* BL21 were used as expression hosts

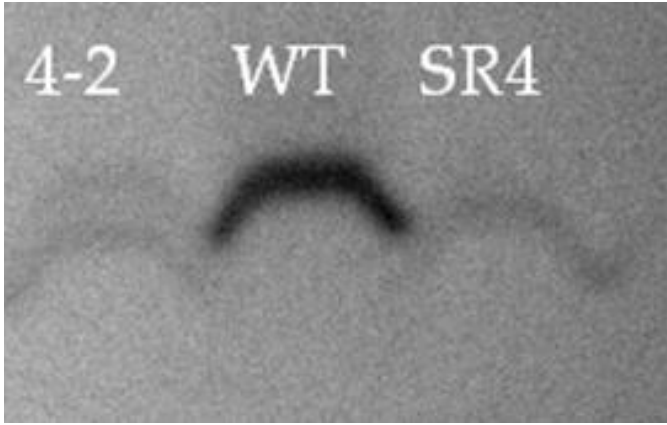

**Supplemental Figure. 3** Electrophoresis mobility comparison of *C. coli* 76339 $\Delta$ *cstV* $\Delta$ *ggt:cstV* (4-2), *C. coli* 76339 WT, and *C. coli* 76339 $\Delta$ *cstV* (SR4).

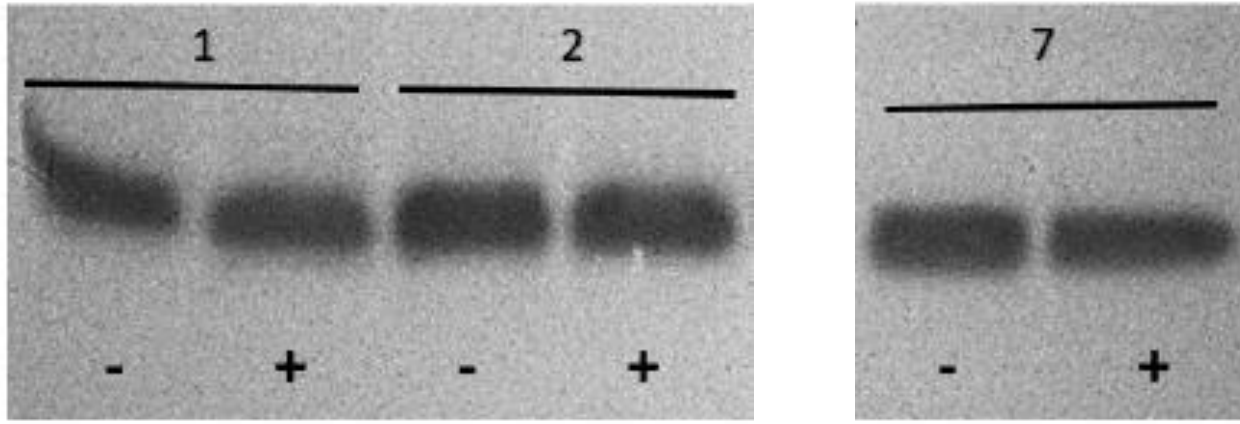

**Supplemental Figure 4.** Silver stain analysis of neuraminidase treated crude LOS. 1. *C. coli* 76339 (*cstV*); 2. *C. coli* 65 (*cstIV*); 7. *C. coli* 73 (*cstIV*); (+) neuraminidase treated, (-) control.

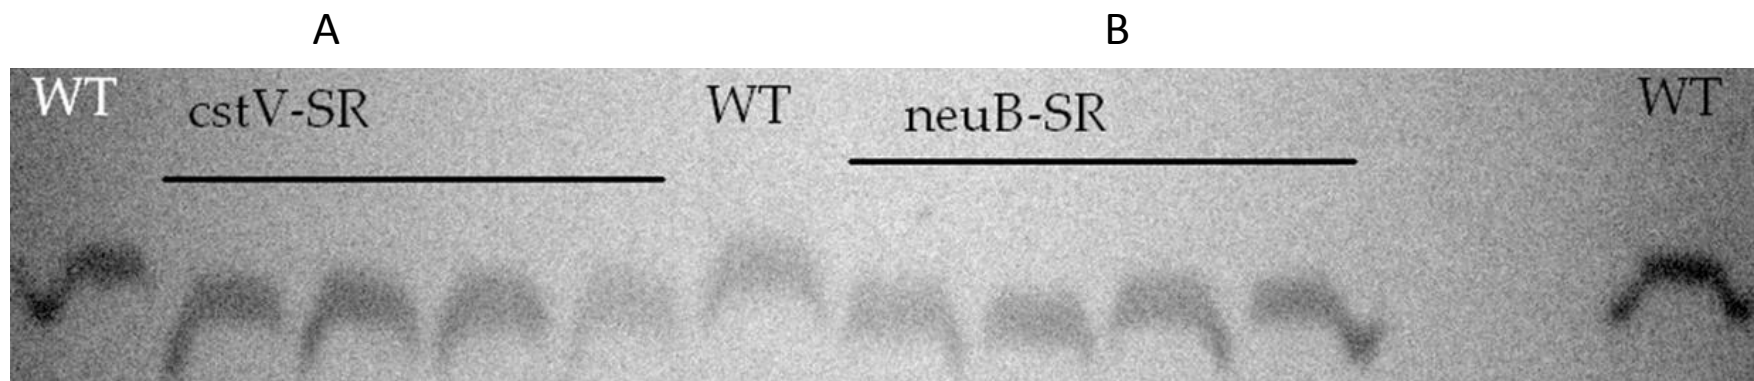

**Supplemental Figure 5.** Electrophoresis mobility comparison of *C. coli* 76339 WT,  $\Delta cstV$ , and  $\Delta neuB$ . **A;** *C. coli* 76339 WT,  $\Delta cstV$ -SR (erythromycin resistance cassette cloned in same direction as *cstV*). **B;**  $\Delta neuB$ -SR (erythromycin resistance cassette cloned in same direction as *neuB*).

```

Bi-Cj-cstII -----MKKVIILAGNGPSLKEIDY SRLPND FDFVFRNCQFYFEDKYYLGKKCKAVFNPILFEQYITLKKHL 65
Cj-cstI MTRTRMENELIVSKNMQNI I ILAGNGPSLKNIN YKRLPRE YDVFRCNQFYFEDKYYLGKKIKAVFFNPGVFLCQYHTAKQL 80
cstIV -----MKNKLNFTKRSVLLIAGNGPSLKEIDY SLLPKEDYDFRCN E FYFEDKYYLGKKIKAAFFW P YFE E YIMQKM 73
cstV -----MIENNAVAVAGNG ILSLKEIDY SRLPKE FDFVFRNCQFYFEDKYYLGRKVKAAFSFPGVFEFEQYITLNTL 68
HAC1267 -----MKNKPLI ILAGNGPSLKDLDYALFPKDFDVFRCNQFYFEDKYYLGR EIKGVFFNAHVFDLQMKITKAI 67
HAC1268 -----MGTIKKPLI ILAGNGPSLKDLDYALFPKDFDVFRCNQFYFEDKYYLGR EIKGVFFNPNCLSSQMCITVQYL 69
HBS-02 -----MPLKPLI ILAGNGPSLKDLDYSLF EFD FDFVFRNCQFYFEDKYYLGR EIVKGVFFNAQVFDLQMKITAREL 67
Pm70 -----MDKFAEHE I KAVI I VAGNGESLSQIDYRLLPKNYDVFRCNQFYFEEFYFLGNKIKAVFFTPGVLEQYITLYHL 74

Bi-Cj-cstII I C N Q E Y E T L I M C S N Y N Q A H L E N E N - - - - F V K T I R Y D Y F P D A H L G Y - D F F K C I K D F N A Y F K F H E I Y F N Q - - R I T S G V Y M C 137
Cj-cstI I L K N E Y E I K N I F C S T F N L P F I E S N D - - - - F L H Q R Y N F F P D A K L G Y - E V I E N L K E F Y A Y I K Y N E I Y F N K - - R I T S G V Y M C 152
cstIV L Q N G D Y E C E N I V C K M Y N F Q D R K E - - - - K I F R E N R K Y F F P A A I N G Y D A F F Y K I K E L S N M I D F D C Y E Y N T T E I T T Y V I 148
cstV M Q N K E Y Y C E N I V C K L F P L Q H E I N Q K S L - R N F K K I R P L F F P Y A L D G N E H Y F N K L K E L N S F I N F N L Y D E G - L Q I T T G M Y A I 146
HAC1267 V K N G E Y H P D H I Y C T H V E P Y G Y V N G N Q Q - - L M Q B Y L E K H F G V R S T Y A Y L K D E P F F I L H S K Y R N F Y D Q - - H F T T G T M M L 142
HAC1268 M N G E Y S I E R F F C S V S T D R H D F D G D Y Q T I L P V D C Y L K A H Y P F V C D T F S L F K G H E E I L K H V K Y H L K T Y S K - - E L S A G V I M L 147
HBS-02 S L R Q E Y Y F E D I F C S T I A P F M N F G N H Y T - - H A Q D Y L D K H Y P G A R N T Y A L L Q S L E P F Y K L Y T T R R N F Y Q Q - - H F T T G V M M I 142
Pm70 K R N E Y F V D N V I L S S F N H P T V D L E K - - - - S Q K I Q A L F I D V I N G Y E K Y L S K I T A F D V Y L R Y K E L Y E N Q - - R I T S G V Y M C 146

Bi-Cj-cstII A V A I A L G Y K E I Y L S G I D F Y Q N - G S S Y A F D T K Q K N L L K L A P N F K N D N S H Y I G H S K N T D I K A L E F F E K T Y K I K L Y C L C P N S L 216
Cj-cstI A A I A I A L G Y K T I Y L C G I D F Y E G - D V I Y P F E A M S T N I K T I F P G I K - D F K P S N C H S K E Y D I E A L K L K S I Y K V N I Y A L C D D S I 230
cstIV C C A V A C G Y K E I Y L A G M D F G D E - K Y N Y F S E K I E K - - - - I K E S K K R - - T K M H H K S I D E K I I D F T Q Q Q Y N V K I F S I C P N S S 220
cstV A C A V A C G Y K E I Y I T G I D F Y S T - Q E Y A F D I K D K I G L Y A L N P S F K I Q - - Y L K S H S K E T D E I L S F I K Q T Y N A N F S I S P K S P 223
HAC1267 L V A I Q L G Y K E I Y L C G I D F Y E N G F G H F Y E - - - - - N Q G G F F E E D S D P M H D K N I D I C A L E L A K K Y - - A K I Y A L V P N S A 210
HAC1268 L S A V V L G Y K E I Y L V G I D F G A S S W G H F Y D E - - - - - S Q S Q H F S N H M A D C E N I Y Y D M L T I C L C Q K Y - - A K I Y A L V P N S P 216
HBS-02 I V A I V L G Y K E I Y C A G I D F Y L E G L G H F Y H - - - - - V K S P H F T L A P D C Q H T K D L D I K G I E V K Q Y - - A C I Y A L V P N S A 210
Pm70 A V A L A M G Y T D I Y L T G I D F Y Q A S E E N Y A F D N K K P N I I R L L P D F R K E K T L F S Y H S K D I D E A L S F I Q Q H Y H V N E Y S I S P M S P 226

Bi-Cj-cstII L A N F I E L A P N - - - - - 226
Cj-cstI L A N H F P L S I N - - - - - 240
cstIV I N A F I P L H P I - - - - - 230
cstV M T K Y I P L A P K - - - - - 233
HAC1267 L V K M I P L S S Q K G V L E K V K D R I G L G E F K R E K F G Q K E L E R Q K E L E R Q K E L E R Q K E L E R Q K E L E R Q K E L E R Q K E L E R 290
HAC1268 L S H L L T I N P Q A K Y P F E L L D K P - I G Y T S D L I I S S P L E E K L L E F K N I E E K L L E F K N I E E K L L E F K N I E E K L L E F K N I E E K L L 295
HBS-02 L S A I L P L S P H K N A L S Q E K - - - - - 228
Pm70 L S K H F P I P T V - - - - - 236

Bi-Cj-cstII -----LNSN--FIIQEKNN-YTKDIIIPSS EAYGKFSKNIN F----- 260
Cj-cstI -----INNN--FTLENKHNN SINDIILTDNTPGVS FYKNQLKAD----NKIMLN FYNILH 289
cstIV -----QNNENI FKP IERPKDAIKTQLTPPIKAVR RYKR-LYLES----NI I IKFFH ELVQ 280
cstV -----QNY S--FDIEEKSS ESIKDELIPSKKAYR NYSRALYLQN----NMFY NFIHDCLK 282
HAC1267 QKELERQKELERQKELERQKELERQKELERQKELERQKELERQKELERQKELERQKELERQKELERQKELERQKELERQKELERQKELERQKELERQKELERQKELERQKELERQKELER 370
HAC1268 E F K N I E E K L L E F K N I E E K L L E F K N I E E K L L E F K N I E E K L L E F K N I E E K L L E F K N I E E K L L E F K N I E E K L L 375
HBS-02 -----M C A L K L G D P K P N G Y I D D V C V D F V E F S M R A T L I Q A T Q S V G I T P D N L I Y K G L N M V W R 283
Pm70 -----E D D C E T T F V A P L K E N Y I N D I L P P H F V Y E K L G T I V S K K S R F H S N L I V R L I R I L L K 291

Bi-Cj-cstII ----- 260
Cj-cstI SKDN I I K F L N K - - - - - 300
cstIV V P R R I R H Y Y S K T R Y T R - - - - - 296
cstV F P S A I K N Y F K N I K K - - - - - 296
HAC1267 L F K G C F A L L D - - - - L K A L K S I I K A F L K R - - - - - 395
HAC1268 E F K N I E E K L L A S R L N N I L R K I K R K I L P F W G G V T P T L K V S F R W G A A 422
HBS-02 C A S D I Y R V V R G - - - - - L Y R L S L K A L Y F L R A W F K R H R A T G G - - - - - 318
Pm70 L P S A I K H Y L K E K - - - - - 303

```

| Important residues for CMP    |        |
|-------------------------------|--------|
| CstII                         | CstIV  |
| Thr131                        | Leu142 |
| Ser132                        | Thr143 |
| Important residues for Neu5Ac |        |
| CstII                         | CstIV  |
| Gln32                         | His40  |
| Asn51                         | Val59  |
| Gln58                         | Glu66  |
| Arg129                        | Glu140 |
| Ser132                        | Thr143 |
| Tyr185                        | Thr189 |

**Supplemental Figure 6.** Multiple sequence alignment of characterized GT-42 sialyltransferases and *C. coli* 76339 *cstV* and *C. coli* 73 *cstIV*.

## Supplemental Material

**Supplemental Table 1.** Bacterial strains and protein expression constructs

| Strain or plasmid                                                           | Genotype and/or phenotype                                                                 | Reference or source |
|-----------------------------------------------------------------------------|-------------------------------------------------------------------------------------------|---------------------|
| <i>C. coli</i> 76339                                                        | <i>cstI</i> , <i>cstV</i> , <i>neuB</i>                                                   | <sup>1</sup>        |
| <i>C. coli</i> 76339 $\Delta$ <i>cstV</i> -SF1                              | <i>cstI</i> , $\Delta$ <i>cstV</i> : Ery, <i>neuB</i>                                     | This study          |
| <i>C. coli</i> 76339 $\Delta$ <i>cstV</i> -SR4                              | <i>cstI</i> , $\Delta$ <i>cstV</i> : Ery, <i>neuB</i>                                     | This study          |
| <i>C. coli</i> 76339 $\Delta$ <i>neuB</i> -SR1                              | <i>cstI</i> , $\Delta$ <i>neuB</i> : Ery, <i>cstV</i>                                     | This study          |
| <i>C. coli</i> 76339 $\Delta$ <i>cstI</i> -XR3                              | $\Delta$ <i>cstI</i> : CAT, <i>cstV</i> , <i>neuB</i>                                     | This study          |
| <i>C. coli</i> 76339 $\Delta$ <i>cstV</i> -SR4 $\Delta$ <i>cstI</i> -XR1    | $\Delta$ <i>cstI</i> : CAT, $\Delta$ <i>cstV</i> : Ery, <i>neuB</i>                       | This study          |
| <i>C. coli</i> 76339 $\Delta$ <i>neuB</i> -SR2                              | <i>cstI</i> , $\Delta$ <i>neuB</i> : Ery, <i>cstV</i>                                     | This study          |
| <i>C. coli</i> 76339 $\Delta$ <i>cstV</i> -SR4 $\Delta$ ggt: <i>cstV</i> -2 | <i>cstI</i> , $\Delta$ <i>cstV</i> : Ery, <i>neuB</i> ,<br>$\Delta$ ggt: <i>cstV</i> :CAT | This study          |
| <i>C. coli</i> 65                                                           | <i>cstIV</i>                                                                              | <sup>2</sup>        |
| <i>C. coli</i> 65 $\Delta$ <i>cstIV</i> -SF5                                | $\Delta$ <i>cstIV</i> :Ery                                                                | This study          |
| <i>C. coli</i> 73                                                           | <i>cstIV</i>                                                                              | <sup>2</sup>        |
| <i>C. coli</i> 73 $\Delta$ <i>cstIV</i> -SF3                                | $\Delta$ <i>cstIV</i> :Ery                                                                | This study          |
| <i>C. coli</i> 73 $\Delta$ <i>neuB2</i>                                     | $\Delta$ <i>neuB2</i> :Ery                                                                | This study          |
| <i>C. jejuni</i> 81-176                                                     |                                                                                           |                     |
| <i>E. coli</i> AD202                                                        |                                                                                           | <sup>3</sup>        |
| <i>E. coli</i> BL21                                                         |                                                                                           |                     |
| <b>Protein expression constructs</b>                                        |                                                                                           |                     |
| pCwMal-ET                                                                   |                                                                                           | <sup>3</sup>        |
| pCw                                                                         |                                                                                           |                     |
| pCwMal-ET_51 <i>cstV</i>                                                    |                                                                                           | This study          |
| pCwMal-ET_73 <i>cstIV</i>                                                   |                                                                                           | This study          |
| pCw_51 <i>cstV</i>                                                          |                                                                                           | This study          |
| pCw_73 <i>cstIV</i>                                                         |                                                                                           | This study          |



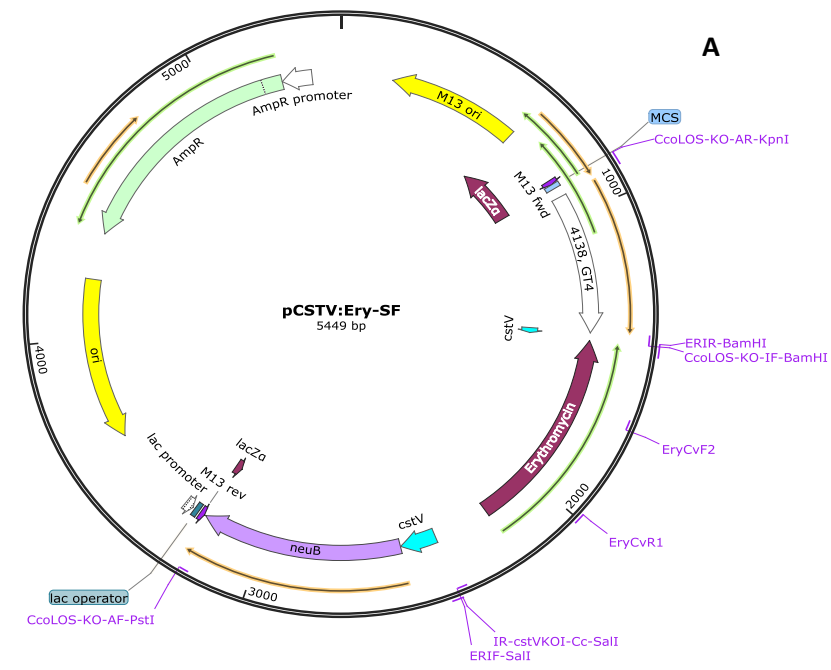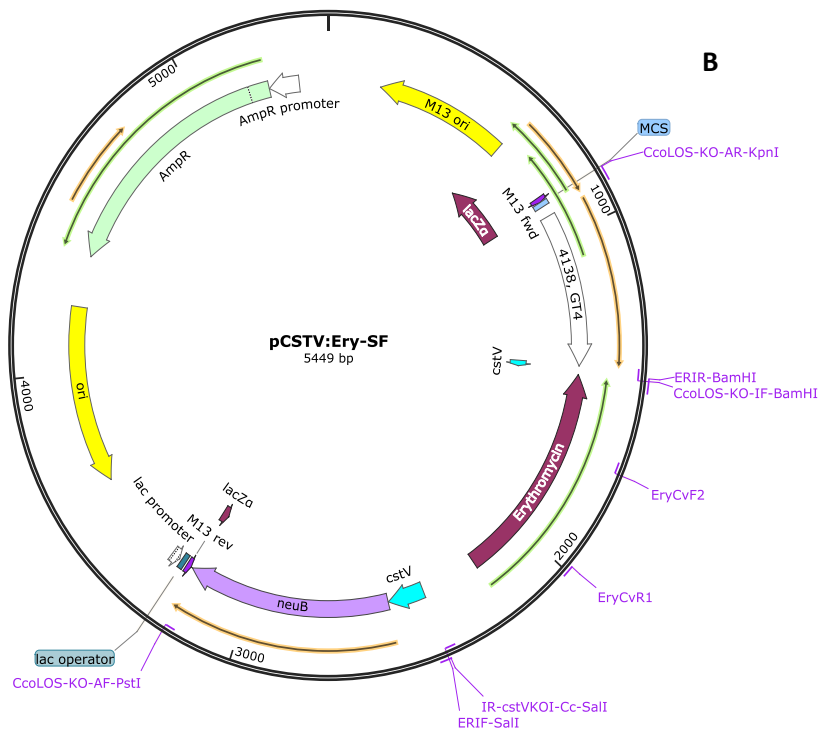

| Primer name                         | Sequence                               |
|-------------------------------------|----------------------------------------|
| <b>cstV amplification</b>           |                                        |
| CcoLOS-KO-AF-PstI                   | ATCTGCAGCCTAATGCAACCGCACCCAAGC         |
| CcoLOS-KO-AR-KpnI                   | AGGTACCATTTATCCCAAAAAGTTGTCTTAAGCGTGG  |
| <b>Inverse PCR</b>                  |                                        |
| IR-cstVKOI-Cc-SalI                  | ACCGTCGACCATATCGAAATTATTCTAGAGCTC      |
| CcoLOS-KO-IF-BamHI                  | AGGATCCGTTTTCTATCATATCTGTCCTCATAG      |
| <b>Erythromycin cassette</b>        |                                        |
| ERIF-SalI                           | ACCGTCGACAGTATAAAACCTTTAAGAACTTTC      |
| ERIR-BamHI                          | ACCGGATCCACTTACTTATTAATAATTTATAGCTATTG |
| ERIR-SalI                           | ACCGTCGACACTTACTTATTAATAATTTATAGCTATTG |
| ERIF-BamHI                          | ACCGGATCCAGTATAAAACCTTTAAGAACTTTC      |
| <b>Mutant verification</b>          |                                        |
| EryCvF1                             | CCTCTTATTATAGCCATTTGTTTGC              |
| EryCvF2                             | ATATTTTCATCCTAAACCTAAAGTGAATAGC        |
| EryCvR1                             | TTATTTTCTGTAGTTTGCATAATTTATGG          |
| EryCvR2                             | GGAGAAAGAGTTTGTGCTAATCTC               |
| <b>Gene expression verification</b> |                                        |
| 09870cFv                            | TAA GTT TTT GGT AGT TTT TGC CTC G      |
| 09870cRv                            | ATTAGCACTAGATGATACAACCAGTG             |
| 09880cFv                            | CAACTAAGATCCCATTATGCCAAG               |
| 09880cRv                            | TAGAAGGTGGAGAGCTTTCAGG                 |
| 09890cFv                            | ACATAGCCTGTAATCTTACTAAATACG            |
| 09890cRv                            | ATAGGTTCAGGAGAATGTAATAACTATCC          |
| 09910cFv                            | GGC TAG TAA GTG CAT AAA TAC TTG C      |
| 09910cRv                            | CGATCAAAGAAAGTGATTTATCCCAA             |
| 09930cFv                            | TGCGTGGTAGAGCTAGGATG                   |
| 09930cRv                            | ACAATGAAAGCACTGATGACACTC               |

**Supplemental Figure 7.** Plasmids and primers for the generation of *C. coli* 76339  $\Delta$ *cstV* mutant strains. **A;** pCSTV:Ery-SF plasmid, **B;** pCSTV:Ery-RF plasmid, **C;** primer list



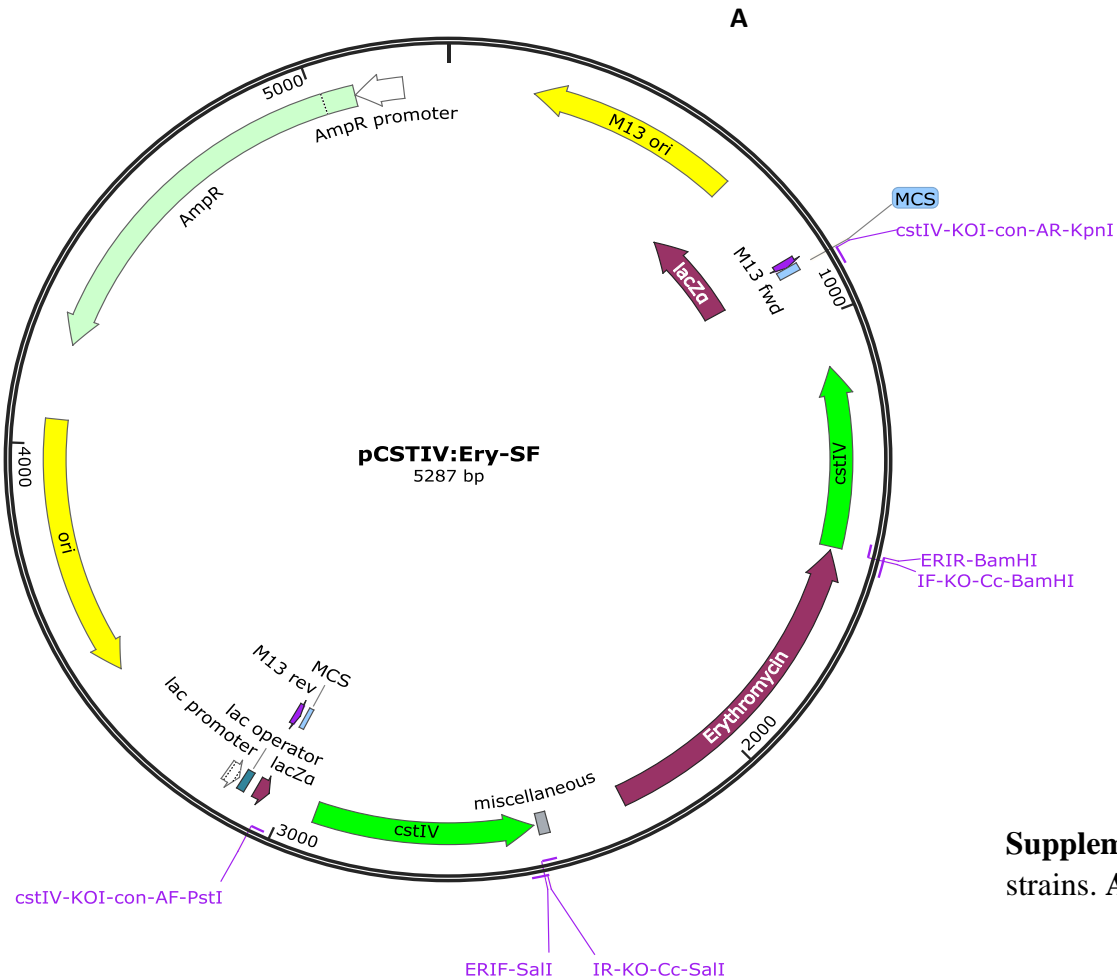

| Primer name                       | Sequence                                   |
|-----------------------------------|--------------------------------------------|
| <b><i>cstIV</i> amplification</b> |                                            |
| <b>cstIV-KOI-con-AF-PstI</b>      | ATCTGCAGGCCAAAACCACTCACTTAAAAG             |
| <b>cstIV-KOI-con-AR-KpnI</b>      | AGGTACCGCAATCGATACTGATAATTTTAACGCT         |
| <b>Inverse PCR</b>                |                                            |
| <b>IF-KO-Cc-BamHI</b>             | AGGATCCGCTGGCATGGATTTTGGAGATG              |
| <b>IR-KO-Cc-SalI</b>              | ATAGTCGACTCTTTATAGCCACATGCAACAGC           |
| <b>Erythromycin cassette</b>      |                                            |
| <b>ERIF-SalI</b>                  | ACCGTCGACAGTATAAAACCTTTAAGAACTTTC          |
| <b>ERIR-BamHI</b>                 | ACCGGATCCACTTACTTATTAATAATTTATAGCTAT<br>TG |
| <b>Mutant verification</b>        |                                            |
| <b>CcCstIVvF</b>                  | AACAGAAATGCTTACTGGCAC                      |
| <b>EryCvF2</b>                    | ATATTTTCATCCTAAACCTAAAGTGAATAGC            |
| <b>EryCvR1</b>                    | TTATTTTCTGTAGTTTTGCATAATTTATGG             |

**Supplemental Figure 8.** Plasmids and primers for the generation of *C. coli* 65 and 73  $\Delta$ *cstIV* mutant strains. **A**; pCSTIV:Ery-SF plasmid, **B**; primer list

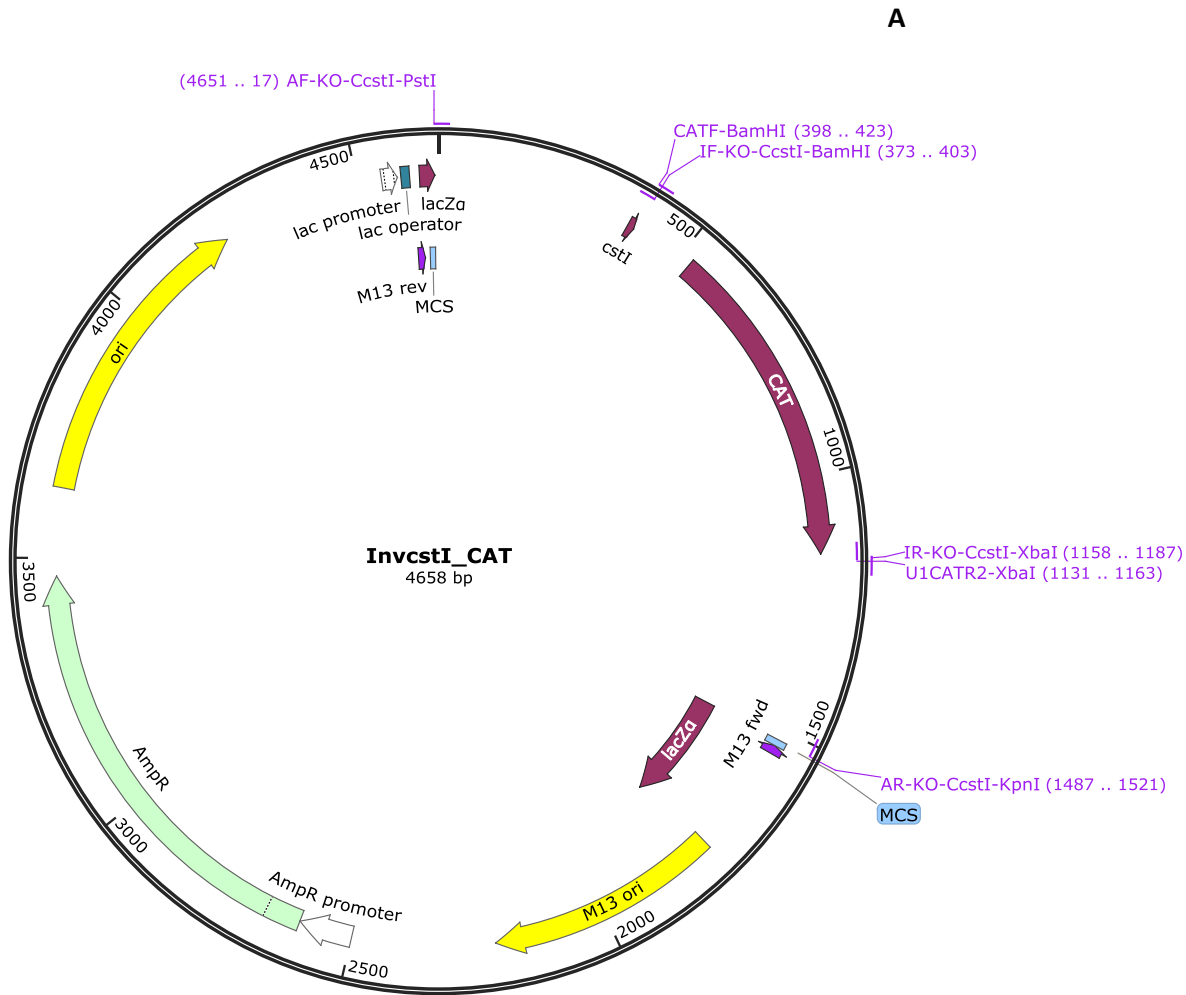

**B**

| Primer name                | Sequence                            |
|----------------------------|-------------------------------------|
| <b>cstI amplification</b>  |                                     |
| AF-KO-CcstI-PstI           | ATCTGCAGAGGAAATGGGCCTAGTCTT         |
| AR-KO-CcstI-KpnI           | AGGTACCCACTATGGATTCATAAGAATTTCTACCT |
| <b>Inverse PCR</b>         |                                     |
| IR-KO-CcstI-XbaI           | ATTCTAGATGAATTTGGCTAAGACTGTAGGTG    |
| IF-KO-CcstI-BamHI          | ACCGGATCCGCTATGGCGCACATATAAATACCAG  |
| <b>CAT cassette</b>        |                                     |
| U1CATR2-XbaI               | ATTCTAGAGGGATTTTATTTATTCAGCAAGTCTTG |
| CATF-BamHI                 | AGGATCCCGGCGGTGTTCCCTTTCCAAG        |
| <b>Mutant verification</b> |                                     |
| cstI-CvR                   | GCATTCTTCTATACAATTTAACTCCC          |
| cstI-CvF                   | ACTAAAAAACGGGAGGGAAGC               |
| CAT-CvR                    | CTCAGTCCAAATACTCGAAAAGG             |
| CAT-CvF                    | TCTATGATACCGTGGACAAGC               |

**Supplemental Figure 9.** Plasmids and primers for the generation of *C. coli* 76339  $\Delta$ *cstI* mutant strains. A; InvstI\_CAT plasmid, B; primer list



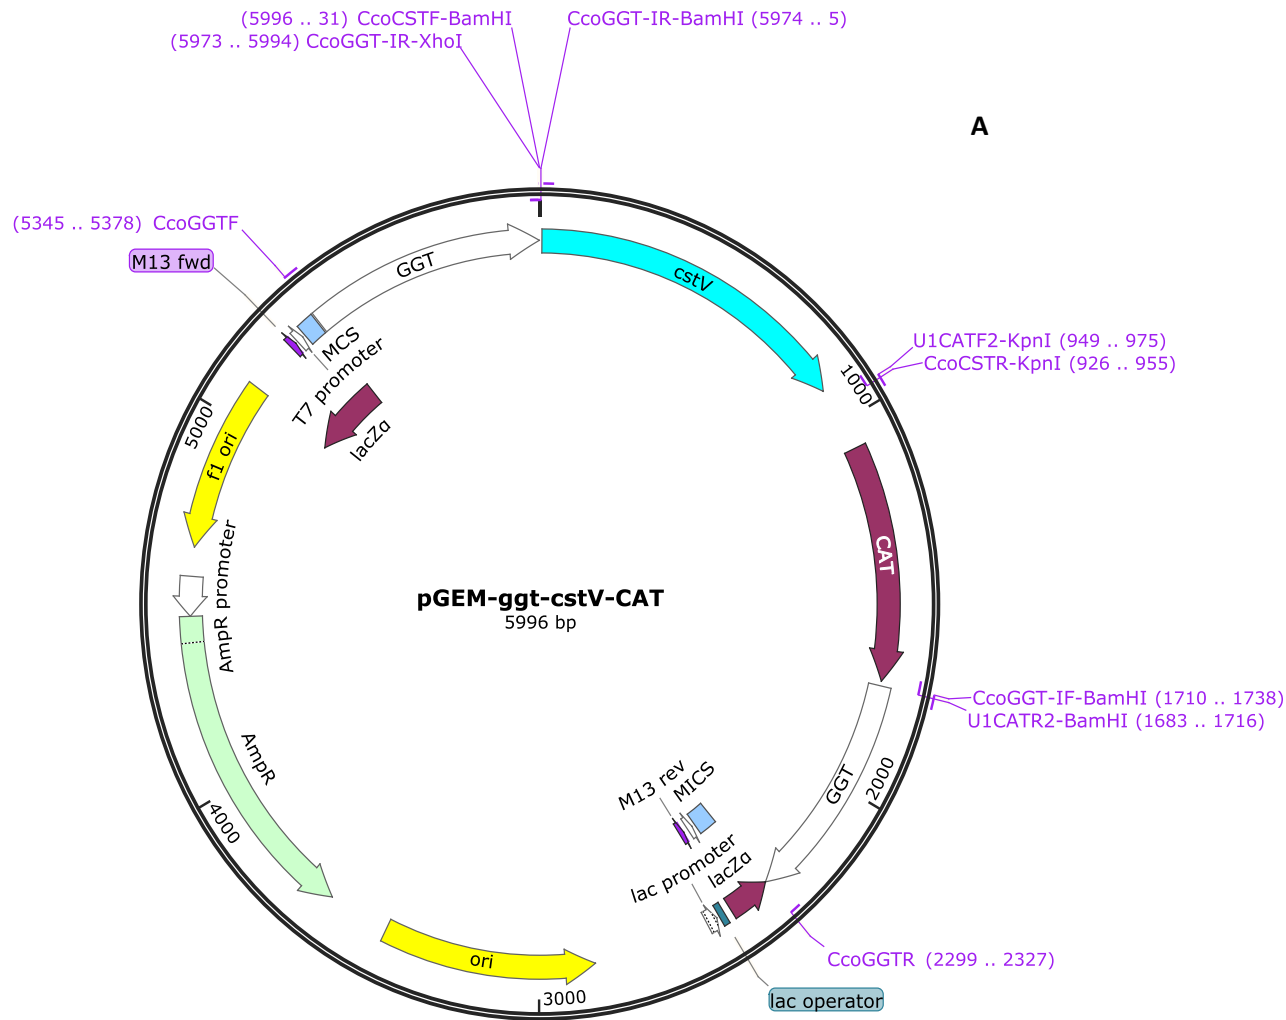

| Primer name               | Sequence                           |
|---------------------------|------------------------------------|
| <b>ggt amplification</b>  |                                    |
| CcoGGTF                   | ATTTAGTTATATTTGTGATTTCAATCACGCTAGG |
| CcoGGTR                   | AAAACCTGTTGTGATGATTCTAGAGCCACC     |
| <b>Inverse PCR</b>        |                                    |
| CcoGGT-IF-BamHI           | AGGATCCTTCTATGTCGCCACCTAGTAGCG     |
| CcoGGT-IR-BamHI           | AGGATCCCAGGGCCTTCTTTGGCGATGAG      |
| <b>cstV amplification</b> |                                    |
| CcoCSTR-KpnI              | ACCGGTACCTTCTTGGGATATGGTTAATTTATC  |
| CcoCSTF-BamHI             | AGGATCCAATGATAGAAAACAATGCAGTTGTTG  |
| <b>CAT cassette</b>       |                                    |
| U1CATR2-KpnI              | AGGTACCGGGATTTTATTTATTCAGCAAGTCTTG |
| U1CATR2-BamHI             | AGGATCCGGGATTTTATTTATTCAGCAAGTCTTG |

**Supplemental Figure 11.** Plasmids and primers for the generation of *cstV* complemented strain. A; pGEM-ggt-cstV-CAT plasmid, B; primer list
